# Supplementary material for: Manual toothbrushing techniques for plaque removal and the prevention of gingivitis—A systematic review with network meta-analysis
Source: PubMed Central journal article supplement (PMC11226064; doi:10.1371/journal.pone.0306302), 2024-07-05
Supplement: pone.0306302.s001.pdf [file pone.0306302.s001.pdf]

## S1: Characteristics of the publications fulfilling the inclusion criteria and analysed in Network meta-analysis (NMA) and/or descriptively

### Legend:

\*: information obtained from the authors of the publication on request;  
 not available: parameter not assessed / no further dates of outcome assessment;  
 n.i.: no information available on request  
 n.r.: no restriction reported

| <b>Ausenda et al., 2019</b>             |                                                                                                                                                                                                                                                                                                                                                                                                                 |
|-----------------------------------------|-----------------------------------------------------------------------------------------------------------------------------------------------------------------------------------------------------------------------------------------------------------------------------------------------------------------------------------------------------------------------------------------------------------------|
| Study design                            | <p>Not included in NMA</p> <p><b>Arms:</b> 2 parallel<br/> <b>Blinding:</b> Examiners blinded<br/> <b>Standardized instruction of the technique:</b> n.i.<br/> <b>Calibration of examiners:</b> yes*</p>                                                                                                                                                                                                        |
| Participants                            | <p><b>Sample size:</b> N=48<br/> <b>Gender:</b> equally distributed (p=.25)<br/> <b>Age:</b> ≥ 18 years<br/> <b>Educational level:</b> n.r.<br/> <b>Dental education:</b> n.r.<br/> <b>General health status:</b> n.r.<br/> <b>Smoking status:</b> non-smokers<br/> <b>Dental status and/or periodontal status:</b> ≥ 20 teeth; cervical bleeding ≥ 20%; healthy cervical periodontal condition (PPD ≤ 3mm)</p> |
| Interventions<br>(n included/completed) | <p><b>Control:</b> no specific technique (24/24)<br/> <b>Intervention:</b> Bass technique (24/21)<br/> <b>Professional tooth cleaning:</b> no<br/> <b>Referral of the instruction to original publication of the technique:</b> refers to Bass (1954)<br/> <b>Instruction describes the technique applied like the original:</b> no*</p>                                                                        |
| Provided devices                        | <p>Toothbrush (Oral B Indiator Soft); toothpaste (Crest Pro Health)*</p>                                                                                                                                                                                                                                                                                                                                        |
| Provided instructions                   | <p><b>All groups:</b><br/>           Brushing twice/day 2 minutes<br/> <b>Intervention group:</b><br/>           Additional instruction with respect to brushing technique<br/> <b>Mode:</b> written and oral<br/> <b>Frequency:</b> 3x at baseline (T1); 4 weeks (T2) and 12 weeks (T3)<br/> <b>Provider/qualification:</b> n.i.<br/> <b>Instruction for application at home:</b> no</p>                       |
| Outcome parameters                      | <p><b>Primary (plaque after toothbrushing):</b> not available*<br/> <b>Secondary (Gingivitis):</b> (modified) GI*</p>                                                                                                                                                                                                                                                                                           |
| Outcome dates                           | <p><b>Primary (last date of outcome assessment):</b> 12 weeks after intervention (T3)<br/> <b>Secondary (first date of outcome assessment):</b> not applicable (instruction at each time point)<br/>           Other: 4 weeks after intervention (T2)</p>                                                                                                                                                       |
| <b>Ceyhan et al., 2018</b>              |                                                                                                                                                                                                                                                                                                                                                                                                                 |
| Study design                            | <p>Not included in NMA</p> <p><b>Arms:</b> 2 parallel<br/> <b>Blinding:</b> examiners blinded*<br/> <b>Standardized instruction of the technique:</b> n.i.<br/> <b>Calibration of examiners:</b> n.i.</p>                                                                                                                                                                                                       |
| Participants                            | <p><b>Sample size:</b> N=163<br/> <b>Gender:</b> 78 female/ 85 male<br/> <b>Age:</b> 5-6 years</p>                                                                                                                                                                                                                                                                                                              |

|                                         |                                                                                                                                                                                                                                                                                                                                                                                                                                                                                                                                                                                                                                                                                 |
|-----------------------------------------|---------------------------------------------------------------------------------------------------------------------------------------------------------------------------------------------------------------------------------------------------------------------------------------------------------------------------------------------------------------------------------------------------------------------------------------------------------------------------------------------------------------------------------------------------------------------------------------------------------------------------------------------------------------------------------|
|                                         | <p><b>Educational level:</b> preschool children<br/> <b>Dental education:</b> no<br/> <b>General health status:</b> no systemic disease; no mental or physical disabilities<br/> <b>Smoking status:</b> not applicable<br/> <b>Dental status and/or periodontal status:</b> no oral soft tissue pathology</p>                                                                                                                                                                                                                                                                                                                                                                   |
| Interventions<br>(n included/completed) | <p><b>1<sup>st</sup>preschool</b><br/> <b>Intervention 1:</b> horizontal scrubbing (17/17)<br/> <b>Intervention 2:</b> Fones (21/21)<br/> <b>2<sup>st</sup>preschool</b><br/> <b>Intervention 1:</b> horizontal scrubbing (22/22)<br/> <b>Intervention 2:</b> Fones (25/25)<br/> <b>3<sup>st</sup>preschool</b><br/> <b>Intervention 1:</b> horizontal scrubbing (39/39)<br/> <b>Intervention 2:</b> Fones (39/39)<br/> <b>Professional tooth cleaning:</b> no<br/> <b>Referral of the instruction to original publication of the technique:</b> no reference for either technique<br/> <b>Instruction describes the technique applied like the original:</b> n.i.</p>          |
| Provided devices                        | Toothbrush and toothpaste appropriate for this age group                                                                                                                                                                                                                                                                                                                                                                                                                                                                                                                                                                                                                        |
| Provided instructions                   | <p><b>All groups:</b><br/> Brushing twice/day<br/> <b>Intervention groups:</b><br/> Additional instruction with respect to respective brushing technique<br/> <b>Mode:</b> via hands-on; interactive oral and dental health education session on models accompanied by powerpoint-presentation<br/> 1<sup>st</sup>preschool: Educational toothbrushing card for the children<br/> 2<sup>st</sup>preschool: oral and dental health education lecture for parents<br/> 3<sup>st</sup>preschool: awarding card at subsequent follow up<br/> <b>Frequency:</b> 1x at baseline (T1)<br/> <b>Provider/qualification:</b> n.i.<br/> <b>Instruction for application at home:</b> no</p> |
| Outcome parameters                      | <p><b>Primary (plaque after toothbrushing):</b> PI<br/> <b>Secondary (Gingivitis):</b> not available</p>                                                                                                                                                                                                                                                                                                                                                                                                                                                                                                                                                                        |
| Outcome dates:                          | <p><b>Primary (last date of outcome assessment):</b> not available (n.i. whether plaque was assessed after toothbrushing at T2-T5)<br/> <b>Secondary (first date of outcome assessment):</b> T1</p>                                                                                                                                                                                                                                                                                                                                                                                                                                                                             |
| <a href="#">Deinzer et al. (2016)</a>   | Included in NMA                                                                                                                                                                                                                                                                                                                                                                                                                                                                                                                                                                                                                                                                 |
| Study design                            | <p><b>Arms:</b> 3 parallel<br/> <b>Blinding:</b> examiners blinded, participants blinded to hypotheses<br/> <b>Standardized instruction of the technique:</b> yes<br/> <b>Calibration of examiners:</b> yes</p>                                                                                                                                                                                                                                                                                                                                                                                                                                                                 |
| Participants                            | <p><b>Sample size:</b> N=93 (n=92 received allocated intervention)<br/> <b>Gender:</b> 58 female/ 34 male<br/> <b>Age:</b> 30-82 years, mean 59.3<br/> <b>Educational level:</b> good language knowledge<br/> <b>Dental education:</b> no<br/> <b>General health status:</b> no physical, mental disabilities that influence oral hygiene<br/> <b>Smoking status:</b> n.r.<br/> <b>Dental status and/or periodontal status:</b> no dental or periodontal treatment needed; ≥ 4 sufficient crowns; ≥ 4 natural teeth</p>                                                                                                                                                         |
| Interventions<br>(n included/completed) | <p><b>Control:</b> no specific technique (30/25)<br/> <b>Intervention 1:</b> Fones (32/27)<br/> <b>Intervention 2:</b> modified Bass (31/27)</p>                                                                                                                                                                                                                                                                                                                                                                                                                                                                                                                                |

|                                         |                                                                                                                                                                                                                                                                                                                                                                                                                                                                                                                                                                                                                                                                                                                                                        |
|-----------------------------------------|--------------------------------------------------------------------------------------------------------------------------------------------------------------------------------------------------------------------------------------------------------------------------------------------------------------------------------------------------------------------------------------------------------------------------------------------------------------------------------------------------------------------------------------------------------------------------------------------------------------------------------------------------------------------------------------------------------------------------------------------------------|
|                                         | <p><b>Professional tooth cleaning:</b> yes – prior to intervention</p> <p><b>Referral of the instruction to original publication of the technique:</b> Bass: refers to Bass (1954) but is described as in Katz (1972); Fones: refers to Fones (1921)</p> <p><b>Instruction describes the technique applied like the original:</b> Bass: in analogy to Katz (1972); Fones: in analogy to Fones (1921; description differs with respect to inner surfaces)</p>                                                                                                                                                                                                                                                                                           |
| Provided devices                        | toothbrush (elmex® interX); toothpaste; floss (elmex®), superfloss (meridol) interdental brushes (elmex®)                                                                                                                                                                                                                                                                                                                                                                                                                                                                                                                                                                                                                                              |
| Provided instructions                   | <p><b>All groups:</b><br/>computer-based training in basics of toothbrushing</p> <p><b>Intervention groups:</b><br/>additional slides with instruction with respect to the respective brushing technique</p> <p><b>Mode:</b> computer-based training (powerpoint slides); patients worked through the presentations alone in their own pace</p> <p><b>Frequency:</b> 1x between baseline (T1) and six weeks (T2)</p> <p><b>Provider/qualification:</b> brushing was assessed by a dentist immediately after instruction; reinstructions were given when necessary</p> <p><b>Instruction for application at home:</b> leaflet with the basics of tooth brushing <u>for all groups</u> and respective additional information for intervention groups</p> |
| Outcome parameters                      | <p><b>Primary (plaque after toothbrushing):</b> MPI (included in NMA); TQHI</p> <p><b>Secondary (Gingivitis):</b> not available</p>                                                                                                                                                                                                                                                                                                                                                                                                                                                                                                                                                                                                                    |
| Outcome dates:                          | <p><b>Primary (last date of outcome assessment):</b> 12 weeks after intervention (T3)</p> <p><b>Secondary (first date of outcome assessment):</b> 6 weeks after intervention (T2)</p> <p>Other: not available</p>                                                                                                                                                                                                                                                                                                                                                                                                                                                                                                                                      |
| <b>Dosumu et al., 2019</b>              | Not included in NMA                                                                                                                                                                                                                                                                                                                                                                                                                                                                                                                                                                                                                                                                                                                                    |
| Study design                            | <p><b>Arms:</b> 2 parallel</p> <p><b>Blinding:</b> examiners blinded</p> <p><b>Standardized instruction of the technique:</b> n.i.</p> <p><b>Calibration of examiners:</b> yes</p>                                                                                                                                                                                                                                                                                                                                                                                                                                                                                                                                                                     |
| Participants                            | <p><b>Sample size:</b> N=50</p> <p><b>Gender:</b> male:female ratio 2:3</p> <p><b>Age:</b> mean 23.1</p> <p><b>Educational level:</b> students (university admission)</p> <p><b>Dental education:</b> (preclinical) dental students</p> <p><b>General health status:</b> n.r.</p> <p><b>Smoking status:</b> n.r.</p> <p><b>Dental status and/or periodontal status:</b> ≥ 6 natural teeth/quadrant, no dentures or other dental prostheses; no teeth crowding teeth in good alignment; no periodontal disease</p>                                                                                                                                                                                                                                      |
| Interventions<br>(n included/completed) | <p><b>Control:</b> no specific technique (25/25)</p> <p><b>Intervention:</b> modified Bass technique (25/25)</p> <p><b>Professional tooth cleaning:</b> yes – prior intervention</p> <p><b>Referral of the instruction to original publication of the technique:</b> no</p> <p><b>Instruction describes the technique applied like the original:</b> n.i.</p>                                                                                                                                                                                                                                                                                                                                                                                          |
| Provided devices                        | toothbrush (medium); fluoridated toothpaste                                                                                                                                                                                                                                                                                                                                                                                                                                                                                                                                                                                                                                                                                                            |
| Provided instructions                   | <p><b>All groups:</b><br/>Brushing twice/day (before breakfast; after dinner) 5 minutes</p> <p><b>Intervention group:</b><br/>additional instruction with respect to brushing technique</p> <p><b>Mode:</b> video and dental model; hands on</p> <p><b>Frequency:</b> 1x at baseline (T1)</p> <p><b>Provider/qualification:</b> n.i.</p>                                                                                                                                                                                                                                                                                                                                                                                                               |

|                                         |                                                                                                                                                                                                                                                                                                                                                                                                                                                                                                                                                                                                                                                                                                                                                                                   |
|-----------------------------------------|-----------------------------------------------------------------------------------------------------------------------------------------------------------------------------------------------------------------------------------------------------------------------------------------------------------------------------------------------------------------------------------------------------------------------------------------------------------------------------------------------------------------------------------------------------------------------------------------------------------------------------------------------------------------------------------------------------------------------------------------------------------------------------------|
|                                         | <b>Instruction for application at home:</b> no                                                                                                                                                                                                                                                                                                                                                                                                                                                                                                                                                                                                                                                                                                                                    |
| Outcome parameters                      | <b>Primary (plaque after toothbrushing):</b> n.i. whether plaque was assessed after toothbrushing<br><b>Secondary (Gingivitis):</b> BOP                                                                                                                                                                                                                                                                                                                                                                                                                                                                                                                                                                                                                                           |
| Outcome dates                           | <b>Primary (last date of outcome assessment):</b> 28 days (T3)<br><b>Secondary (first date of outcome assessment):</b> 7 days (T2)<br>Other: not available                                                                                                                                                                                                                                                                                                                                                                                                                                                                                                                                                                                                                        |
| <b>Harnacke et al. (2012)</b>           | Included in NMA                                                                                                                                                                                                                                                                                                                                                                                                                                                                                                                                                                                                                                                                                                                                                                   |
| Study design                            | <b>Arms:</b> 3 parallel<br><b>Blinding:</b> examiners blinded, participants blinded to hypotheses<br><b>Standardized instruction of the technique:</b> yes<br><b>Calibration of examiners:</b> yes                                                                                                                                                                                                                                                                                                                                                                                                                                                                                                                                                                                |
| Participants                            | <b>Sample size:</b> N=67 (n=64 received allocated intervention)<br><b>Gender:</b> 44 female/ 12 male<br><b>Age:</b> mean 23.2<br><b>Educational level:</b> students (university admission)<br><b>Dental education:</b> no<br><b>General health status:</b> no physical, mental disabilities that influence oral hygiene; no serious disease*<br><b>Smoking status:</b> non-smokers<br><b>Dental status and/or periodontal status:</b> ≥ 20 natural teeth; ≥ 10 teeth showing plaque or bleeding                                                                                                                                                                                                                                                                                   |
| Interventions<br>(n included/completed) | <b>Control:</b> no specific technique (23/19)<br><b>Intervention 1:</b> Fones (22/19)<br><b>Intervention 2:</b> modified Bass (22/18)<br><b>Professional tooth cleaning:</b> yes – prior to intervention<br><b>Referral of the instruction to original publication of the technique:</b> Bass: refers to Hellwege (2003) and APA; Fones: refers to APA<br><b>Instruction describes the technique applied like the original:</b> Bass: in analogy to Katz (1972); Fones: in analogy to Fones (1921; description differs with respect to inner surfaces)                                                                                                                                                                                                                            |
| Provided devices                        | toothbrush (elmex® interX); toothpaste (elmex®); floss (elmex® waxed and unwaxed)                                                                                                                                                                                                                                                                                                                                                                                                                                                                                                                                                                                                                                                                                                 |
| Provided instructions                   | <b>All groups:</b><br>computer-based training in basics of toothbrushing; video instruction “how to floss”<br><b>Intervention groups:</b><br>additional slides with instruction with respect to the respective brushing technique<br><b>Mode:</b> computer-based training (powerpoint slides and video instruction); patients worked through the presentations alone in their own pace<br><b>Frequency:</b> 1x between baseline (T1) and six weeks (T2)<br><b>Provider/qualification:</b> brushing was assessed by a dentist immediately after instruction; reinstructions were given when necessary<br><b>Instruction for application at home:</b> leaflet with the basics of tooth brushing <u>for all groups</u> and respective additional information for intervention groups |
| Outcome parameters                      | <b>Primary (Plaque):</b> MPI (included in NMA); TQHI<br><b>Secondary (Gingivitis):</b> PBI                                                                                                                                                                                                                                                                                                                                                                                                                                                                                                                                                                                                                                                                                        |
| Outcome dates                           | <b>Primary (last date of outcome assessment):</b> 28 weeks after intervention (T4)<br><b>Secondary (first date of outcome assessment):</b> 6 weeks after intervention (T2)<br>Other: 12 weeks after intervention (T3)                                                                                                                                                                                                                                                                                                                                                                                                                                                                                                                                                             |
| <b>Harnacke et al. (2016)</b>           | Included in NMA                                                                                                                                                                                                                                                                                                                                                                                                                                                                                                                                                                                                                                                                                                                                                                   |
| Study design                            | <b>Arms:</b> 3 parallel<br><b>Blinding:</b> examiners blinded, participants blinded to hypotheses<br><b>Standardized instruction of the technique:</b> yes                                                                                                                                                                                                                                                                                                                                                                                                                                                                                                                                                                                                                        |

|                                         |                                                                                                                                                                                                                                                                                                                                                                                                                                                                                                                                                                                                                                                                                                                                                |
|-----------------------------------------|------------------------------------------------------------------------------------------------------------------------------------------------------------------------------------------------------------------------------------------------------------------------------------------------------------------------------------------------------------------------------------------------------------------------------------------------------------------------------------------------------------------------------------------------------------------------------------------------------------------------------------------------------------------------------------------------------------------------------------------------|
|                                         | <b>Calibration of examiners:</b> yes                                                                                                                                                                                                                                                                                                                                                                                                                                                                                                                                                                                                                                                                                                           |
| Participants                            | <p><b>Sample size:</b> N=70 (n=69 received allocated intervention)<br/> <b>Gender:</b> 45 female/ 25 male<br/> <b>Age:</b> 18-19 years old<br/> <b>Educational level:</b> n.r.<br/> <b>Dental education:</b> no<br/> <b>General health status:</b> no physical, mental disabilities that influence oral hygiene; no serious disease*<br/> <b>Smoking status:</b> n.r.<br/> <b>Dental status and/or periodontal status:</b> n.r.</p>                                                                                                                                                                                                                                                                                                            |
| Interventions<br>(n included/completed) | <p><b>Control:</b> no specific technique (23/23)<br/> <b>Intervention 1:</b> Fones (23/23)<br/> <b>Intervention 2:</b> modified Bass (24/23)<br/> <b>Professional tooth cleaning:</b> yes – prior to intervention<br/> <b>Referral of the instruction to original publication of the technique:</b> no<br/> <b>Instruction describes the technique applied like the original:</b> no description but refers to Harnacke et al. (2012)</p>                                                                                                                                                                                                                                                                                                      |
| Provided devices                        | toothbrush (elmex® interX); toothpaste (elmex®); floss (elmex® waxed and unwaxed)                                                                                                                                                                                                                                                                                                                                                                                                                                                                                                                                                                                                                                                              |
| Provided instructions                   | <p><b>All groups:</b><br/> computer-based training in basics of toothbrushing<br/> <b>Intervention groups:</b><br/> additional slides with instruction with respect to the respective brushing technique<br/> <b>Mode:</b> computer-based training (powerpoint slides); patients worked through the presentations alone in their own pace<br/> <b>Frequency:</b> 1x between baseline (T1) and six weeks (T2)<br/> <b>Provider/qualification:</b> brushing was assessed by a dentist immediately after instruction; reinstructions were given when necessary<br/> <b>Instruction for application at home:</b> leaflet with the basics of tooth brushing <u>for all groups</u> and respective additional information for intervention groups</p> |
| Outcome parameters                      | <p>Primary (Plaque): MPI<br/> <b>Secondary (Gingivitis):</b> BOP</p>                                                                                                                                                                                                                                                                                                                                                                                                                                                                                                                                                                                                                                                                           |
| Outcome dates                           | <p><b>Primary (last date of outcome assessment):</b> 28 weeks after intervention (T4)<br/> <b>Secondary (first date of outcome assessment):</b> 6 weeks after intervention (T2)<br/> Other: 12 weeks after intervention (T3)</p>                                                                                                                                                                                                                                                                                                                                                                                                                                                                                                               |
| <a href="#">Janakiram et al., 2020</a>  | Not included in NMA                                                                                                                                                                                                                                                                                                                                                                                                                                                                                                                                                                                                                                                                                                                            |
| Study design                            | <p><b>Arms:</b> 2 parallel<br/> <b>Blinding:</b> examiners blinded<br/> <b>Standardized instruction of the technique:</b> n.i.<br/> <b>Calibration of examiners:</b> yes</p>                                                                                                                                                                                                                                                                                                                                                                                                                                                                                                                                                                   |
| Participants                            | <p><b>Sample size:</b> N=120<br/> <b>Gender:</b> 66.6% female<br/> <b>Age:</b> 18-30 years; mean 22.0<br/> <b>Educational level:</b> students (university admission)<br/> <b>Dental education:</b> dental students<br/> <b>General health status:</b> n.r.<br/> <b>Smoking status:</b> non-smokers<br/> <b>Dental status and/or periodontal status:</b> ≥ 20 teeth; mild to moderate gingivitis; no history of periodontal therapy or disease</p>                                                                                                                                                                                                                                                                                              |
| Interventions<br>(n included/completed) | <p><b>Control:</b> no specific technique (40/40)<br/> <b>Intervention 1:</b> Fones (40/40)<br/> <b>Intervention 2:</b> modified Bass (40/38)<br/> <b>Professional tooth cleaning:</b> no</p>                                                                                                                                                                                                                                                                                                                                                                                                                                                                                                                                                   |

|                                            |                                                                                                                                                                                                                                                                                                                                                                                                                                                                                                                                                                                                                                                                                                                                                                             |
|--------------------------------------------|-----------------------------------------------------------------------------------------------------------------------------------------------------------------------------------------------------------------------------------------------------------------------------------------------------------------------------------------------------------------------------------------------------------------------------------------------------------------------------------------------------------------------------------------------------------------------------------------------------------------------------------------------------------------------------------------------------------------------------------------------------------------------------|
|                                            | <p><b>Referral of the instruction to original publication of the technique:</b> no</p> <p><b>Instruction describes the technique applied like the original:</b> modified Bass: in analogy to Katz (1972); Fones: in analogy to Fones (1921)</p> <p><i>Note: instruction not described in the paper but in the clinical trials registry form</i></p>                                                                                                                                                                                                                                                                                                                                                                                                                         |
| Provided devices                           | toothbrush (standard, soft bristled); toothpaste (Colgate Total® Advanced Health)                                                                                                                                                                                                                                                                                                                                                                                                                                                                                                                                                                                                                                                                                           |
| Provided instructions                      | <p><b>All groups:</b><br/>Instruction: brushing twice a day using toothbrush and toothpaste</p> <p><b>Intervention groups</b><br/><b>Mode:</b> computer-based training (powerpoint slides and videos); demonstration on study models;</p> <p><b>Frequency:</b> 4x at baseline (T1), 24h (T2), one week (T3) and four weeks (T4)</p> <p><b>Provider/qualification:</b> brushing technique was performed in the presence of the trial coordinator during each visit</p> <p><b>Instruction for application at home:</b> leaflet describing respective brushing technique</p>                                                                                                                                                                                                   |
| Outcome parameters                         | <p><b>Primary (plaque after toothbrushing):</b> n.i. whether plaque was assessed after toothbrushing</p> <p><b>Secondary (Gingivitis):</b> GI</p>                                                                                                                                                                                                                                                                                                                                                                                                                                                                                                                                                                                                                           |
| Outcome dates                              | <p><b>Primary (last date of outcome assessment):</b> not applicable (instruction at each time point)</p> <p><b>Secondary (first date of outcome assessment):</b> 4 weeks after intervention (T4) (additional instructions and assessments 24h and 1 week after intervention)</p>                                                                                                                                                                                                                                                                                                                                                                                                                                                                                            |
| <a href="#">Kanchanakamol et al., 1993</a> | Not included in NMA                                                                                                                                                                                                                                                                                                                                                                                                                                                                                                                                                                                                                                                                                                                                                         |
| Study design                               | <p><b>Arms:</b> 4 parallel</p> <p><b>Blinding:</b> n.i.</p> <p><b>Standardized instruction of the technique:</b> n.i.</p> <p><b>Calibration of examiners:</b> yes</p>                                                                                                                                                                                                                                                                                                                                                                                                                                                                                                                                                                                                       |
| Participants                               | <p><b>Sample size:</b> N=100 (n=92 received allocated intervention)</p> <p><b>Gender:</b> n.i.</p> <p><b>Age:</b> 21-22 years</p> <p><b>Educational level:</b> soldiers of Air Base</p> <p><b>Dental education:</b> no</p> <p><b>General health status:</b> n.r.</p> <p><b>Smoking status:</b> n.r.</p> <p><b>Dental status and/or periodontal status:</b> no dental or mucosal disease; teeth in good alignment</p>                                                                                                                                                                                                                                                                                                                                                        |
| Interventions<br>(n included/completed)    | <p><b>Intervention 1:</b> Roll technique (standard toothbrush) (25/23)</p> <p><b>Intervention 2:</b> Bass technique (standard toothbrush) (25/23)</p> <p><b>Intervention 3:</b> Roll technique (Concept 45° toothbrush) (25/23)</p> <p><b>Intervention 4:</b> Bass technique (Concept 45° toothbrush) (25/23)</p> <p><b>Professional tooth cleaning:</b> dental scaling (by dental students) prior intervention</p> <p><b>Referral of the instruction to original publication of the technique:</b> Roll technique: refers to Hansen &amp; Giermo (1971; the cited paper does not describe a roll technique); Bass: refers to Bass (1954)</p> <p><b>Instruction describes the technique applied like the original:</b> Roll: see above; Bass: in analogy to Bass (1954)</p> |
| Provided devices                           | Standard toothbrush; Concept 45° toothbrush                                                                                                                                                                                                                                                                                                                                                                                                                                                                                                                                                                                                                                                                                                                                 |
| Provided instructions                      | <p><b>All groups:</b><br/>Brushing twice/day 2 minutes</p> <p><b>Intervention groups:</b><br/>Oral hygiene instruction with respect to the respective brushing technique</p> <p><b>Mode:</b> instruction in small groups for 2h</p> <p><b>Frequency:</b> 1x at baseline (T1)</p> <p><b>Provider/qualification:</b> n.i.</p> <p><b>Instruction for application at home:</b> no</p>                                                                                                                                                                                                                                                                                                                                                                                           |

|                                         |                                                                                                                                                                                                                                                                                                                                                                                                                                                                     |
|-----------------------------------------|---------------------------------------------------------------------------------------------------------------------------------------------------------------------------------------------------------------------------------------------------------------------------------------------------------------------------------------------------------------------------------------------------------------------------------------------------------------------|
| Outcome parameters                      | <b>Primary (plaque after toothbrushing):</b> modified Navy Plaque Index<br><b>Secondary (Gingivitis):</b> not available                                                                                                                                                                                                                                                                                                                                             |
| Outcome dates:                          | <b>Primary (last date of outcome assessment):</b> 2 weeks after intervention (T2)<br><b>Secondary (first date of outcome assessment):</b> not applicable (identical to T2)<br>Other: not available                                                                                                                                                                                                                                                                  |
| <b>Sarvia et al., 1989</b>              | Not included in NMA                                                                                                                                                                                                                                                                                                                                                                                                                                                 |
| Study design                            | <b>Arms:</b> 4 parallel<br><b>Blinding:</b> n.i.<br><b>Standardized instruction of the technique:</b> n.i.<br><b>Calibration of examiners:</b> n.i.                                                                                                                                                                                                                                                                                                                 |
| Participants                            | <b>Sample size:</b> N=64<br><b>Gender:</b> 36 female/ 28 male<br><b>Age:</b> 4-12 years<br><b>Educational level:</b> (pre)school children<br><b>Dental education:</b> no<br><b>General health status:</b> no mental retardation / no physical condition compromising perceptual or motor functioning<br><b>Smoking status:</b> n.r.<br><b>Dental status and/or periodontal status:</b> no caries                                                                    |
| Interventions<br>(n included/completed) | <b>Control 1:</b> no specific technique (17/17)<br><b>Control 2:</b> no specific technique plus incentive (14/14)<br><b>Intervention 1:</b> horizontal scrubbing (15/15)<br><b>Intervention 2:</b> horizontal scrubbing plus incentive (18/18)<br><b>Professional tooth cleaning:</b> no<br><b>Referral of the instruction to original publication of the technique:</b> no<br><b>Instruction describes the technique applied like the original:</b> not applicable |
| Provided devices                        | Toothbrush                                                                                                                                                                                                                                                                                                                                                                                                                                                          |
| Provided instructions                   | <u>Control groups:</u><br>no instruction<br><u>Intervention groups:</u><br>instruction in horizontal scrubbing<br>Mode: Individual instruction<br><b>Frequency:</b> 1x at baseline (T1)<br><b>Provider/qualification:</b> n.i.<br><b>Instruction for application at home:</b> no                                                                                                                                                                                    |
| Outcome parameters                      | <b>Primary (plaque after toothbrushing):</b> Plaque (n.i. about the index)<br><b>Secondary (Gingivitis):</b> not available                                                                                                                                                                                                                                                                                                                                          |
| Outcome dates                           | <b>Primary (last date of outcome assessment):</b> 1 week after intervention (T2)<br><b>Secondary (first date of outcome assessment):</b> not applicable (identical to T2)<br>Other: not available                                                                                                                                                                                                                                                                   |
| <b>Schlueter et al., 2013</b>           | Included in NMA                                                                                                                                                                                                                                                                                                                                                                                                                                                     |
| Study design                            | <b>Arms:</b> 3 parallel<br><b>Blinding:</b> examiner 1 (plaque assessment) not blinded; examiner 2 (video recording) blinded<br><b>Standardized instruction of the technique:</b> yes<br><b>Calibration of examiners:</b> yes                                                                                                                                                                                                                                       |
| Participants                            | <b>Sample size:</b> N=98<br><b>Gender:</b> not reported<br><b>Age:</b> mean 26.6<br><b>Educational level:</b> students (university admission)<br><b>Dental education:</b> no                                                                                                                                                                                                                                                                                        |

|                                         |                                                                                                                                                                                                                                                                                                                                                                                                                                                                                                                                                                                   |
|-----------------------------------------|-----------------------------------------------------------------------------------------------------------------------------------------------------------------------------------------------------------------------------------------------------------------------------------------------------------------------------------------------------------------------------------------------------------------------------------------------------------------------------------------------------------------------------------------------------------------------------------|
|                                         | <p><b>General health status:</b> no physical, mental disabilities that influence oral hygiene; no serious disease*</p> <p><b>Smoking status:</b> n.r.</p> <p><b>Dental status and/or periodontal status:</b> ≥ 24 teeth; no serious periodontitis no multiple recessions (1/3 of root lengths)</p>                                                                                                                                                                                                                                                                                |
| Interventions<br>(n included/completed) | <p><b>Control:</b> no specific technique (33/27)</p> <p><b>Intervention 1:</b> modified Bass (leaflet) (32/24)</p> <p><b>Intervention 2:</b> modified Bass (demonstration) (33/26)</p> <p><b>Professional tooth cleaning:</b> yes – prior intervention</p> <p><b>Referral of the instruction to original publication of the technique:</b> no</p> <p><b>Instruction describes the technique applied like the original:</b> modified Bass: in analogy to Katz (1972; the authors instructed 3-5 jiggling and wiping cycles per area*)</p>                                          |
| Provided devices                        | toothbrush (elmex® interX)                                                                                                                                                                                                                                                                                                                                                                                                                                                                                                                                                        |
| Provided instructions                   | <p><b>Control group:</b><br/>Instruction 4 weeks after last visit: verbal instruction</p> <p><b>Intervention groups:</b><br/><b>Mode:</b><br/>Intervention 1: verbal instruction and a leaflet containing major steps the technique and brushing sequence<br/>Intervention 2: verbal instruction supported by demonstration with a model</p> <p><b>Frequency:</b> 2x at baseline (T1) and 2 weeks (T2)</p> <p><b>Provider/qualification:</b> a dentist trained and reevaluated participants' technique during the study</p> <p><b>Instruction for application at home:</b> no</p> |
| Outcome parameters                      | <p>Primary (Plaque): TQHI</p> <p><b>Secondary (Gingivitis):</b> not available</p>                                                                                                                                                                                                                                                                                                                                                                                                                                                                                                 |
| Outcome dates                           | <p><b>Primary (last date of outcome assessment):</b> 4 weeks after intervention (T3)</p> <p><b>Secondary (first date of outcome assessment):</b> 2 weeks after intervention (T2)</p> <p>Other: not available</p>                                                                                                                                                                                                                                                                                                                                                                  |
| <b>Schmalz et al., 2018</b>             | Included in NMA                                                                                                                                                                                                                                                                                                                                                                                                                                                                                                                                                                   |
| Study design                            | <p><b>Arms:</b> 6 parallel (2 arms relevant for review)</p> <p><b>Blinding:</b> examiner blinded</p> <p><b>Standardized instruction of the technique:</b> n.i.</p> <p><b>Calibration of examiners:</b> yes</p>                                                                                                                                                                                                                                                                                                                                                                    |
| Participants                            | <p><b>Sample size:</b> N=50 (n=48 received allocated intervention)</p> <p><b>Gender:</b> 39 female/ 9 male</p> <p><b>Age:</b> 18-30 years; mean 23.7</p> <p><b>Educational level:</b> students (university admission)</p> <p><b>Dental education:</b> no</p> <p><b>General health status:</b> no physical, mental disabilities that influence oral hygiene; no serious disease</p> <p><b>Smoking status:</b> n.r.</p> <p><b>Dental status and/or periodontal status:</b> ≥ 20 teeth; healthy oral condition (PSI ≤ 2)</p>                                                         |
| Interventions<br>(n included/completed) | <p><b>Control:</b> no specific technique (24/22)</p> <p><b>Intervention:</b> Fones (24/22)</p> <p><b>Professional tooth cleaning:</b> yes – prior intervention</p> <p><b>Referral of the instruction to original publication of the technique:</b> no</p> <p><b>Instruction describes the technique applied like the original:</b> in analogy to Fones (1921; description differs with respect to inner surfaces)</p>                                                                                                                                                             |
| Provided devices                        | toothbrush (elmex® interX); toothpaste (Sensodyne)                                                                                                                                                                                                                                                                                                                                                                                                                                                                                                                                |
| Provided instructions                   | <b>All groups:</b>                                                                                                                                                                                                                                                                                                                                                                                                                                                                                                                                                                |



|                                         |                                                                                                                                                                                                                                                                                                                                                                                                                                                                 |
|-----------------------------------------|-----------------------------------------------------------------------------------------------------------------------------------------------------------------------------------------------------------------------------------------------------------------------------------------------------------------------------------------------------------------------------------------------------------------------------------------------------------------|
|                                         | <p>Brushing twice/day 2-3 minutes</p> <p><b>Intervention group:</b><br/> additional instruction with respect to brushing technique<br/> <b>Mode:</b> oral instruction and demonstration on model and hands on*<br/> <b>Frequency:</b> 1x at baseline (T1)<br/> <b>Provider/qualification:</b> dentist<br/> <b>Instruction for application at home:</b> no</p>                                                                                                   |
| Outcome parameters                      | <p><b>Primary (plaque after toothbrushing):</b> not available<br/> <b>Secondary (Gingivitis):</b> GI (included in NMA); PBI</p>                                                                                                                                                                                                                                                                                                                                 |
| Outcome dates                           | <p><b>Primary (last date of outcome assessment):</b> 12 weeks after intervention (T3)<br/> <b>Secondary (first date of outcome assessment):</b> 2 weeks after intervention (T1)<br/> Other: 4 weeks after intervention (T2)</p>                                                                                                                                                                                                                                 |
| <b>Smutkeeree et al., 2011</b>          | Included in NMA                                                                                                                                                                                                                                                                                                                                                                                                                                                 |
| Study design                            | <p><b>Arms:</b> 2 parallel<br/> <b>Blinding:</b> n.i.<br/> <b>Standardized instruction of the technique:</b> n.i.<br/> <b>Calibration of examiners:</b> n.i.</p>                                                                                                                                                                                                                                                                                                |
| Participants                            | <p><b>Sample size:</b> N=60 (n=57 received allocated intervention)<br/> <b>Gender:</b> 26 female/ 34 male<br/> <b>Age:</b> 10 – 12 years; mean 11.0<br/> <b>Educational level:</b> school children<br/> <b>Dental education:</b> no<br/> <b>General health status:</b> visually impaired otherwise healthy children<br/> <b>Smoking status:</b> n.r.<br/> <b>Dental status and/or periodontal status:</b> ≥ 4 teeth/quadrant; periodontal healthy condition</p> |
| Interventions<br>(n included/completed) | <p><b>Intervention 1:</b> modified Bass (28/28)<br/> <b>Intervention 2:</b> horizontal scrubbing (29/29)<br/> <b>Professional tooth cleaning:</b> no<br/> <b>Referral of the instruction to original publication of the technique:</b> no<br/> <b>Instruction describes the technique applied like the original:</b> n.i.</p>                                                                                                                                   |
| Provided devices                        | Toothbrush (soft, round-end bristles, straight angled (Berman Plus Child))                                                                                                                                                                                                                                                                                                                                                                                      |
| Provided instructions                   | <p><b>All groups:</b><br/> Brushing twice/day (morning and before bedtime) 2 minutes</p> <p><b>Intervention groups:</b><br/> additional instruction with respect to the respective brushing technique<br/> <b>Mode:</b> individually verbal and tactile<br/> <b>Frequency:</b> 1x at baseline (T1)<br/> <b>Provider/qualification:</b> n.i.<br/> <b>Instruction for application at home:</b> no</p>                                                             |
| Outcome parameters                      | <p><b>Primary (plaque after toothbrushing):</b> n.i. whether plaque was assessed after toothbrushing<br/> <b>Secondary (Gingivitis):</b> GI</p>                                                                                                                                                                                                                                                                                                                 |
| Outcome dates                           | <p><b>Primary (last date of outcome assessment):</b> 6 months after intervention (T3)<br/> <b>Secondary (first date of outcome assessment):</b> 1 month after intervention (T2)<br/> Other: not available</p>                                                                                                                                                                                                                                                   |
| <b>Zhang et al., 2005</b>               | Not included in NMA                                                                                                                                                                                                                                                                                                                                                                                                                                             |
| Study design                            | <p><b>Arms:</b> 2 crossover (each technique in counterbalanced order)<br/> <b>Blinding:</b> examiner blinded<br/> <b>Standardized instruction of the technique:</b> n.i.<br/> <b>Calibration of examiners:</b> n.i.</p>                                                                                                                                                                                                                                         |

|                                         |                                                                                                                                                                                                                                                                                                                                                                                                                                                                                                                                    |
|-----------------------------------------|------------------------------------------------------------------------------------------------------------------------------------------------------------------------------------------------------------------------------------------------------------------------------------------------------------------------------------------------------------------------------------------------------------------------------------------------------------------------------------------------------------------------------------|
| Participants                            | <p><b>Sample size:</b> N=40<br/> <b>Gender:</b> 27 female/ 13 male<br/> <b>Age:</b> 18-35 years<br/> <b>Educational level:</b> students (university admission)<br/> <b>Dental education:</b> no<br/> <b>General health status:</b> no systemic diseases<br/> <b>Smoking status:</b> n.r.<br/> <b>Dental status and/or periodontal status:</b> ≥ 24 teeth in good alignment; no or only marginal gingivitis and no periodontitis, no denture or cervical fillings</p>                                                               |
| Interventions<br>(n included/completed) | <p><b>Intervention 1:</b> modified Bass (40)<br/> <b>Intervention 2:</b> vertical brushing (40)<br/> <b>Professional tooth cleaning:</b> yes – before the instruction of the respective technique (day 0 and day 14)<br/> <b>Referral of the instruction to original publication of the technique:</b> Bass: refers to Bass (1948); vertical brushing: no<br/> <b>Instruction describes the technique applied like the original:</b> n.i.</p>                                                                                      |
| Provided devices                        | <p>Toothbrush (crest flat head soft bristle); toothpaste (fluoridated)</p>                                                                                                                                                                                                                                                                                                                                                                                                                                                         |
| Provided instructions                   | <p><b>Intervention groups:</b><br/> Instruction with respect to the respective brushing technique<br/> <b>Mode:</b> individual instruction on the model and practice with further help<br/> <b>Frequency:</b> days 1-4: 2x/day instruction and correction of brushing by assistant with 1<sup>st</sup> technique; days 15-19: 2x/day instruction and correction of brushing by assistant with 2<sup>nd</sup> technique<br/> <b>Provider/qualification:</b> study assistant<br/> <b>Instruction for application at home:</b> no</p> |
| Outcome parameters                      | <p><b>Primary (plaque after toothbrushing):</b> Modified Benson Proximal Marginal Index<br/> <b>Secondary (Gingivitis):</b> not available</p>                                                                                                                                                                                                                                                                                                                                                                                      |
| Outcome dates                           | <p><b>Primary (last date of outcome assessment):</b> day 6 (T1) and day 20 (T2)<br/> <b>Secondary (first date of outcome assessment):</b> not available<br/> Other: not available</p>                                                                                                                                                                                                                                                                                                                                              |
