# Supplementary material for: Manual toothbrushing techniques for plaque removal and the prevention of gingivitis—A systematic review with network meta-analysis
Source: PubMed Central journal article supplement (PMC11226064; doi:10.1371/journal.pone.0306302), 2024-07-05
Supplement: pone.0306302.s002.pdf [file pone.0306302.s002.pdf]

## Appendix S2: Reports that could not be obtained and reports excluded after full-text reading

| Study                                                        | Reason for Exclusion                                                                                                                               | Identifier (DOI, PMID)                                                                                                                                                  |
|--------------------------------------------------------------|----------------------------------------------------------------------------------------------------------------------------------------------------|-------------------------------------------------------------------------------------------------------------------------------------------------------------------------|
| Allen et al. (1992)                                          | reports not accessible: only conference abstract available                                                                                         | <a href="https://www.cochranelibrary.com/central/doi/10.1002/central/CN-00670514/full">https://www.cochranelibrary.com/central/doi/10.1002/central/CN-00670514/full</a> |
| Allet et al. (1972)                                          | intervention: no training of a technique                                                                                                           | 4502488                                                                                                                                                                 |
| Arai & Kinoshita (1977)                                      | study type: no randomization                                                                                                                       | 10.11480/btmd.240205                                                                                                                                                    |
| Battaglia (2008)                                             | intervention: no comparison of techniques                                                                                                          | 10.1111/j.1601-5037.2008.00302.x                                                                                                                                        |
| Curto-Manrique et al. (2019)                                 | intervention: not self brushed                                                                                                                     | 10.4103/JISPPD.JISPPD_274_18                                                                                                                                            |
| da Silva et al. (1978)                                       | study type: no randomization                                                                                                                       | 283460                                                                                                                                                                  |
| Disyam (1987)                                                | study type: no randomization                                                                                                                       | 3483850                                                                                                                                                                 |
| Frandsen et al. (1970)                                       | intervention: no comparison of techniques                                                                                                          | 10.1111/j.1600-0722.1970.tb02098.x                                                                                                                                      |
| Frandsen et al. (1972)                                       | outcome: no information available whether plaque was assessed after toothbrushing                                                                  | 10.1111/j.1600-0722.1972.tb00290.x                                                                                                                                      |
| Gibson & Wade (1977)                                         | intervention: randomization confounded with brush type                                                                                             | 10.1902/jop.1977.48.8.456                                                                                                                                               |
| Gonçalves et al. (2007)                                      | intervention: other research question; only occlusal surfaces of the eruption teeth brushed                                                        | 17366759                                                                                                                                                                |
| Guedes-Pinto et al. (1978)                                   | study type: no randomization                                                                                                                       | 293810                                                                                                                                                                  |
| Hapsari et al. (2020)                                        | study type: no randomization                                                                                                                       | 10.4103/jioh.jioh_175_19                                                                                                                                                |
| Hotz et al. (1984)                                           | population: laboratory model, no humans<br>outcome: no information available on request to authors whether plaque was assessed after toothbrushing | 6591418                                                                                                                                                                 |
| Ju et al. (2019)                                             | outcome: no information available on request to authors whether plaque was assessed after toothbrushing                                            | 10.1016/j.apnr.2018.12.008                                                                                                                                              |
| Kardel & Bay (1973)                                          | study type: no randomization                                                                                                                       | 4536268                                                                                                                                                                 |
| Kitahara et al. (1990)                                       | study type: no randomization                                                                                                                       | 10.2329/period.32.299                                                                                                                                                   |
| Kremers et al. (1978)                                        | study type: no randomization                                                                                                                       | 271589                                                                                                                                                                  |
| Lee et al. (2020)                                            | intervention: no self-applied toothbrushing                                                                                                        | 10.5051/jpis.2020.50.2.83                                                                                                                                               |
| Morita et al. (1998)                                         | intervention: no self-applied toothbrushing; no randomization                                                                                      | 10.1111/j.1600-051x.1998.tb02377.x                                                                                                                                      |
| Mun et al. (2014)                                            | intervention: no comparison of techniques; unclear whether self-applied toothbrushing                                                              | 10.1111/idh.12053                                                                                                                                                       |
| Ott et al. (1991)                                            | population: laboratory model, no humans                                                                                                            | 1818627                                                                                                                                                                 |
| Poyato-Ferrera et al. (2003)                                 | study type: no randomization                                                                                                                       | 10.1034/j.1601-5037.2003.00018.x                                                                                                                                        |
| Robinson (1976)                                              | outcome: no information available whether plaque was assessed after toothbrushing                                                                  | 10.2105/ajph.66.11.1078                                                                                                                                                 |
| Sangnes (1974)                                               | study type: no randomization (4 conditions were randomly allocated to 4 clusters, i.e. school classes, but not to participants)                    | 4594788                                                                                                                                                                 |
| Sangnes et al. (1972)                                        | study type: no randomization                                                                                                                       | 4552613                                                                                                                                                                 |
| Schlueter et al. (2010)                                      | outcome: neither plaque nor bleeding assessed                                                                                                      | 10.1007/s00784-009-0269-1                                                                                                                                               |
| Schlueter et al. (2021)                                      | study type: no randomization                                                                                                                       | 10.1371/journal.pone.0261496                                                                                                                                            |
| Setiyohadi (1997)                                            | reports not accessible: only conference abstract available                                                                                         | <a href="https://www.cochranelibrary.com/central/doi/10.1002/central/CN-00432612/full">https://www.cochranelibrary.com/central/doi/10.1002/central/CN-00432612/full</a> |
| Shick et al. (1961)                                          | study type: no randomization                                                                                                                       | 10.1902/jop.1961.32.4.346                                                                                                                                               |
| Shin (1987)                                                  | intervention: no comparison of techniques                                                                                                          | 3474326                                                                                                                                                                 |
| Shoji et al. (1988)                                          | intervention: no comparison of techniques                                                                                                          | 10.2329/period.30.566                                                                                                                                                   |
| Sousa (1999)                                                 | reports not accessible: only conference abstract available                                                                                         | <a href="https://www.webofscience.com/wos/woscc/full-record/WOS:000080316600751">https://www.webofscience.com/wos/woscc/full-record/WOS:000080316600751</a>             |
| Suppipat (1973)                                              | reports not accessible: not available                                                                                                              | 4527263                                                                                                                                                                 |
| Ueda & Ono (1979)                                            | reports not accessible: not available                                                                                                              | 292118                                                                                                                                                                  |
| Ueda et al. (1981)                                           | intervention: no comparison of techniques                                                                                                          | 10.2329/period.23.367                                                                                                                                                   |
| Watanabe et al. (1987)                                       | intervention: no comparison of techniques                                                                                                          | 10.2329/period.29.610                                                                                                                                                   |
| Weng et al. (2023)<br><i>result from supplemental search</i> | outcome: no information available on request to authors whether plaque was assessed after toothbrushing                                            | 10.1016/j.jdent.2023.104571                                                                                                                                             |
| Yankell et al. (1993)                                        | intervention: no comparison of techniques                                                                                                          | 8267875                                                                                                                                                                 |
