# Supplementary material for: Manual toothbrushing techniques for plaque removal and the prevention of gingivitis—A systematic review with network meta-analysis
Source: PubMed Central journal article supplement (PMC11226064; doi:10.1371/journal.pone.0306302), 2024-07-05
Supplement: pone.0306302.s004.pdf [file pone.0306302.s004.pdf]

## Appendix S4. CINeMA outputs.

This supplementary information contains all outputs of the CINeMA tool. The CINeMA outputs show the results for the different outcomes (primary plaque, secondary plaque, primary gingivitis, secondary gingivitis) for all studies and for studies with adults only.

### Table of contents

|                                                                                |    |
|--------------------------------------------------------------------------------|----|
| 1. CINeMA-Output: <b>Primary Plaque (all studies)</b> .....                    | 2  |
| 2. CINeMA-Output: <b>Secondary Plaque (all studies)</b> .....                  | 4  |
| 3. CINeMA-Output: <b>Secondary Plaque (studies with adults only)</b> .....     | 8  |
| 4. CINeMA-Output: <b>Primary Gingivitis (all studies)</b> .....                | 10 |
| 5. CINeMA-Output: <b>Primary Gingivitis (studies with adults only)</b> .....   | 13 |
| 6. CINeMA-Output: <b>Secondary Gingivitis (all studies)</b> .....              | 16 |
| 7. CINeMA-Output: <b>Secondary Gingivitis (studies with adults only)</b> ..... | 19 |

# 1. CINeMA-Output: Primary Plaque (all studies)

|    | id | study                     | year | feature | outcome | index | t1      | n1 | y1    | sd1   | rob | indirectness | t2    | n2 | y2    | sd2   |
|----|----|---------------------------|------|---------|---------|-------|---------|----|-------|-------|-----|--------------|-------|----|-------|-------|
| 1  | 2  | Harnacke et al. (2012)    | 2012 | plaque  | primary | MPI   | Control | 19 | 58.71 | 18.63 | 2   | 1            | Fones | 19 | 52.57 | 17.01 |
| 2  | 2  | Harnacke et al. (2012)    | 2012 | plaque  | primary | MPI   | Control | 19 | 58.71 | 18.63 | 2   | 1            | Bass  | 18 | 63.59 | 17.03 |
| 3  | 2  | Harnacke et al. (2012)    | 2012 | plaque  | primary | MPI   | Fones   | 19 | 52.57 | 17.01 | 2   | 1            | Bass  | 18 | 63.59 | 17.03 |
| 4  | 3  | Schlueter et al. (2013.1) | 2013 | plaque  | primary | TQHI  | Control | 27 | 1.72  | 0.48  | 3   | 1            | Bass  | 24 | 1.52  | 0.58  |
| 5  | 4  | Schlueter et al. (2013.2) | 2013 | plaque  | primary | TQHI  | Control | 27 | 1.72  | 0.48  | 3   | 1            | Bass  | 26 | 1.5   | 0.69  |
| 6  | 5  | Deinzer et al. (2016.1)   | 2016 | plaque  | primary | MPI   | Control | 30 | 70.04 | 16    | 1   | 1            | Fones | 32 | 71.89 | 15.29 |
| 7  | 5  | Deinzer et al. (2016.1)   | 2016 | plaque  | primary | MPI   | Control | 30 | 70.04 | 16    | 1   | 1            | Bass  | 30 | 67.18 | 18.21 |
| 8  | 5  | Deinzer et al. (2016.1)   | 2016 | plaque  | primary | MPI   | Fones   | 32 | 71.89 | 15.29 | 1   | 1            | Bass  | 30 | 67.18 | 18.21 |
| 9  | 6  | Deinzer et al. (2016.2)   | 2016 | plaque  | primary | MPI   | Control | 30 | 34.34 | 20.13 | 1   | 1            | Fones | 32 | 31.9  | 20.35 |
| 10 | 6  | Deinzer et al. (2016.2)   | 2016 | plaque  | primary | MPI   | Control | 30 | 34.34 | 20.13 | 1   | 1            | Bass  | 30 | 31.23 | 22.73 |
| 11 | 6  | Deinzer et al. (2016.2)   | 2016 | plaque  | primary | MPI   | Fones   | 32 | 31.9  | 20.35 | 1   | 1            | Bass  | 30 | 31.23 | 22.73 |
| 12 | 7  | Harnacke et al. (2016)    | 2016 | plaque  | primary | MPI   | Control | 22 | 78.89 | 10.66 | 1   | 1            | Fones | 23 | 72.87 | 15.69 |
| 13 | 7  | Harnacke et al. (2016)    | 2016 | plaque  | primary | MPI   | Control | 22 | 78.89 | 10.66 | 1   | 1            | Bass  | 23 | 80.93 | 13.39 |
| 14 | 7  | Harnacke et al. (2016)    | 2016 | plaque  | primary | MPI   | Fones   | 23 | 72.87 | 15.69 | 1   | 1            | Bass  | 23 | 80.93 | 13.39 |

Node size by:  Node color by:  Edge width by:  Edge color by:

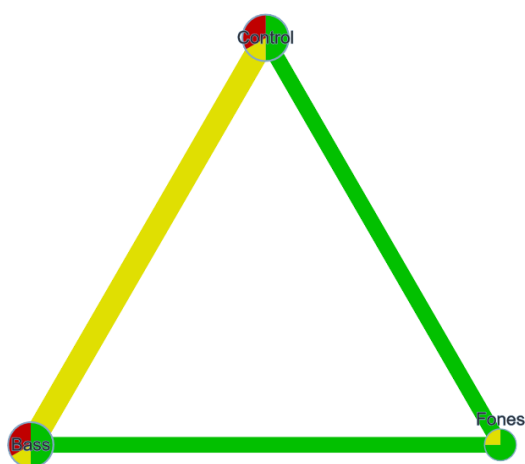

**Risk of bias contributions:** The bar chart shows the contributions of each piece of study to the network estimate

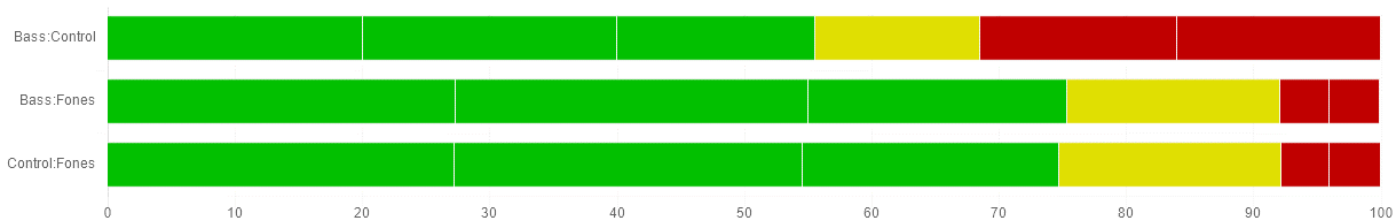

**Selected Rule:** Average RoB

|                                                                                                                                                                                                                                                 |                                                                                                                                                                                                                                           |                                                                                                                                                                                                                                              |
|-------------------------------------------------------------------------------------------------------------------------------------------------------------------------------------------------------------------------------------------------|-------------------------------------------------------------------------------------------------------------------------------------------------------------------------------------------------------------------------------------------|----------------------------------------------------------------------------------------------------------------------------------------------------------------------------------------------------------------------------------------------|
| <p><b>Comparison</b> Bass:Control</p> <p><b>Evidence:</b> mixed</p> <p>Majority RoB: No concerns</p> <p>Average RoB: <b>Some concerns</b></p> <p>Highest RoB: Major concerns</p> <p>NMA judgment <input type="text" value="Some concerns"/></p> | <p><b>Comparison</b> Bass:Fones</p> <p><b>Evidence:</b> mixed</p> <p>Majority RoB: No concerns</p> <p>Average RoB: <b>No concerns</b></p> <p>Highest RoB: Major concerns</p> <p>NMA judgment <input type="text" value="No concerns"/></p> | <p><b>Comparison</b> Control:Fones</p> <p><b>Evidence:</b> mixed</p> <p>Majority RoB: No concerns</p> <p>Average RoB: <b>No concerns</b></p> <p>Highest RoB: Major concerns</p> <p>NMA judgment <input type="text" value="No concerns"/></p> |
|-------------------------------------------------------------------------------------------------------------------------------------------------------------------------------------------------------------------------------------------------|-------------------------------------------------------------------------------------------------------------------------------------------------------------------------------------------------------------------------------------------|----------------------------------------------------------------------------------------------------------------------------------------------------------------------------------------------------------------------------------------------|

**Reporting Bias:** Judgement „all low Risk“

**Indirectness:** Judgement “all no concerns”

**Imprecision:** Clinically important effect size set at 0.2

|                                                                                                                                                                                                                                                                                   |                                                                                                                                                                                                                                                                                                    |                                                                                                                                                                                                                                                                                   |
|-----------------------------------------------------------------------------------------------------------------------------------------------------------------------------------------------------------------------------------------------------------------------------------|----------------------------------------------------------------------------------------------------------------------------------------------------------------------------------------------------------------------------------------------------------------------------------------------------|-----------------------------------------------------------------------------------------------------------------------------------------------------------------------------------------------------------------------------------------------------------------------------------|
| <p><b>Comparison</b> Bass:Control<br/><b>Evidence: mixed</b></p> <p>NMA estimate: <b>-0.129</b><br/>95% Confidence interval:<br/><i>Confidence interval (-0.377,0.119)</i><br/><i>extends into clinically important effects</i></p> <p>Imprecision judgment<br/>Some concerns</p> | <p><b>Comparison</b> Bass:Fones<br/><b>Evidence: mixed</b></p> <p>NMA estimate: <b>0.091</b><br/>95% Confidence interval:<br/><i>Confidence interval (-0.200,0.382)</i><br/><i>extends into clinically important effects in both directions</i></p> <p>Imprecision judgment<br/>Major concerns</p> | <p><b>Comparison</b> Control:Fones<br/><b>Evidence: mixed</b></p> <p>NMA estimate: <b>0.220</b><br/>95% Confidence interval:<br/><i>Confidence interval (-0.070,0.510)</i><br/><i>extends into clinically important effects</i></p> <p>Imprecision judgment<br/>Some concerns</p> |
|-----------------------------------------------------------------------------------------------------------------------------------------------------------------------------------------------------------------------------------------------------------------------------------|----------------------------------------------------------------------------------------------------------------------------------------------------------------------------------------------------------------------------------------------------------------------------------------------------|-----------------------------------------------------------------------------------------------------------------------------------------------------------------------------------------------------------------------------------------------------------------------------------|

## Heterogeneity

The estimated value of between-study variance for the network meta-analysis is **0.017**

|                                                                                                                                                                                                                                                                                                                                                                |                                                                                                                                                                                                                                                                                                                                                                   |                                                                                                                                                                                                                                                                                                                                                                |
|----------------------------------------------------------------------------------------------------------------------------------------------------------------------------------------------------------------------------------------------------------------------------------------------------------------------------------------------------------------|-------------------------------------------------------------------------------------------------------------------------------------------------------------------------------------------------------------------------------------------------------------------------------------------------------------------------------------------------------------------|----------------------------------------------------------------------------------------------------------------------------------------------------------------------------------------------------------------------------------------------------------------------------------------------------------------------------------------------------------------|
| <p><b>Comparison</b> Bass:Control<br/><b>Evidence: mixed</b></p> <p>NMA estimate: <b>-0.129</b><br/>95% intervals for NMA estimate<br/>Confidence interval: (-0.377,0.119)<br/>Prediction interval: (-0.557,0.299)<br/><i>Prediction interval extends into clinically important or unimportant effects</i></p> <p>Heterogeneity judgment<br/>Some concerns</p> | <p><b>Comparison</b> Bass:Fones<br/><b>Evidence: mixed</b></p> <p>NMA estimate: <b>0.091</b><br/>95% intervals for NMA estimate<br/>Confidence interval: (-0.200,0.382)<br/>Prediction interval: (-0.375,0.557)<br/><i>Confidence and prediction intervals agree in relation to clinically important effect</i></p> <p>Heterogeneity judgment<br/>No concerns</p> | <p><b>Comparison</b> Control:Fones<br/><b>Evidence: mixed</b></p> <p>NMA estimate: <b>0.220</b><br/>95% intervals for NMA estimate<br/>Confidence interval: (-0.070,0.510)<br/>Prediction interval: (-0.245,0.685)<br/><i>Prediction interval extends into clinically important or unimportant effects</i></p> <p>Heterogeneity judgment<br/>Some concerns</p> |
|----------------------------------------------------------------------------------------------------------------------------------------------------------------------------------------------------------------------------------------------------------------------------------------------------------------------------------------------------------------|-------------------------------------------------------------------------------------------------------------------------------------------------------------------------------------------------------------------------------------------------------------------------------------------------------------------------------------------------------------------|----------------------------------------------------------------------------------------------------------------------------------------------------------------------------------------------------------------------------------------------------------------------------------------------------------------------------------------------------------------|

## Incoherence

Global test based on a random-effects design-by-treatment interaction model

$\chi^2$  statistic: 2.010 (1 degrees of freedom), P value: 0.156

|                                                                                                                                                                                                                                  |                                                                                                                                                                                                                                                                                                                                                                                                                                                               |                                                                                                                                                                                                                                                                                                                                                                                                                                                                  |
|----------------------------------------------------------------------------------------------------------------------------------------------------------------------------------------------------------------------------------|---------------------------------------------------------------------------------------------------------------------------------------------------------------------------------------------------------------------------------------------------------------------------------------------------------------------------------------------------------------------------------------------------------------------------------------------------------------|------------------------------------------------------------------------------------------------------------------------------------------------------------------------------------------------------------------------------------------------------------------------------------------------------------------------------------------------------------------------------------------------------------------------------------------------------------------|
| <p><b>Comparison</b> Bass:Control<br/><b>Evidence: direct</b></p> <p>Direct standardised mean difference: <b>-0.128(-0.376,0.120)</b><br/>Inconsistency measures: Not applicable</p> <p>Incoherence judgment<br/>No concerns</p> | <p><b>Comparison</b> Bass:Fones<br/><b>Evidence: mixed</b></p> <p>NMA standardised mean difference: <b>0.091(-0.200,0.382)</b><br/>Direct standardised mean difference: <b>0.153(-0.151,0.458)</b><br/>Indirect standardised mean difference: <b>-0.563(-1.552,0.426)</b></p> <p>Inconsistency measures<br/>Difference of standardised mean differences: <b>0.717(-0.318,1.751)</b><br/>P value: <b>0.175</b></p> <p>Incoherence judgment<br/>No concerns</p> | <p><b>Comparison</b> Control:Fones<br/><b>Evidence: mixed</b></p> <p>NMA standardised mean difference: <b>0.220(-0.070,0.510)</b><br/>Direct standardised mean difference: <b>0.164(-0.139,0.467)</b><br/>Indirect standardised mean difference: <b>0.831(-0.171,1.832)</b></p> <p>Inconsistency measures<br/>Difference of standardised mean differences: <b>-0.666(-1.713,0.380)</b><br/>P value: <b>0.212</b></p> <p>Incoherence judgment<br/>No concerns</p> |
|----------------------------------------------------------------------------------------------------------------------------------------------------------------------------------------------------------------------------------|---------------------------------------------------------------------------------------------------------------------------------------------------------------------------------------------------------------------------------------------------------------------------------------------------------------------------------------------------------------------------------------------------------------------------------------------------------------|------------------------------------------------------------------------------------------------------------------------------------------------------------------------------------------------------------------------------------------------------------------------------------------------------------------------------------------------------------------------------------------------------------------------------------------------------------------|

## Overall rating of the confidence into the evidence

| Comparison       | Number of Studies | Within-study bias | Reporting bias | Indirectness | Imprecision    | Heterogeneity | Incoherence | Confidence rating | Reason(s) for downgrading                       |
|------------------|-------------------|-------------------|----------------|--------------|----------------|---------------|-------------|-------------------|-------------------------------------------------|
| Mixed evidence   |                   |                   |                |              |                |               |             |                   |                                                 |
| Bass vs Control  | 6                 | Some concerns     | Low risk       | No concerns  | Some concerns  | Some concerns | No concerns | Low               | Within-study bias   Imprecision   Heterogeneity |
| Bass vs Fones    | 4                 | No concerns       | Low risk       | No concerns  | Major concerns | No concerns   | No concerns | Low               | Imprecision                                     |
| Control vs Fones | 4                 | No concerns       | Low risk       | No concerns  | Some concerns  | Some concerns | No concerns | Moderate          | Imprecision   Heterogeneity                     |

## 2. CINeMA-Output: Secondary Plaque (all studies)

|    | id | study                     | year | feature | outcome   | index | t1      | n1 | y1    | sd1   | rob | indirectness | t2    | n2 | y2    | sd2   |
|----|----|---------------------------|------|---------|-----------|-------|---------|----|-------|-------|-----|--------------|-------|----|-------|-------|
| 1  | 2  | Harnacke et al. (2012)    | 2012 | plaque  | secondary | MPI   | Control | 19 | 62.51 | 20.05 | 2   | 1            | Fones | 18 | 50.19 | 15.33 |
| 2  | 2  | Harnacke et al. (2012)    | 2012 | plaque  | secondary | MPI   | Control | 19 | 62.51 | 20.05 | 2   | 1            | Bass  | 18 | 64.72 | 19.31 |
| 3  | 2  | Harnacke et al. (2012)    | 2012 | plaque  | secondary | MPI   | Fones   | 18 | 50.19 | 15.33 | 2   | 1            | Bass  | 18 | 64.72 | 19.31 |
| 4  | 3  | Schlueter et al. (2013.1) | 2013 | plaque  | secondary | TQHI  | Control | 27 | 1.8   | 0.47  | 3   | 1            | Bass  | 24 | 1.58  | 0.58  |
| 5  | 4  | Schlueter et al. (2013.2) | 2013 | plaque  | secondary | TQHI  | Control | 27 | 1.8   | 0.47  | 3   | 1            | Bass  | 26 | 1.64  | 0.58  |
| 6  | 5  | Deinzer et al. (2016.1)   | 2016 | plaque  | secondary | MPI   | Control | 30 | 76.18 | 14.93 | 1   | 1            | Fones | 32 | 71.99 | 14.92 |
| 7  | 5  | Deinzer et al. (2016.1)   | 2016 | plaque  | secondary | MPI   | Control | 30 | 76.18 | 14.93 | 1   | 1            | Bass  | 30 | 70.56 | 16.9  |
| 8  | 5  | Deinzer et al. (2016.1)   | 2016 | plaque  | secondary | MPI   | Fones   | 32 | 71.99 | 14.92 | 1   | 1            | Bass  | 30 | 70.56 | 16.9  |
| 9  | 6  | Deinzer et al. (2016.2)   | 2016 | plaque  | secondary | MPI   | Control | 30 | 42.18 | 25.56 | 1   | 1            | Fones | 32 | 36.78 | 23.99 |
| 10 | 6  | Deinzer et al. (2016.2)   | 2016 | plaque  | secondary | MPI   | Control | 30 | 42.18 | 25.56 | 1   | 1            | Bass  | 30 | 39.24 | 23.41 |
| 11 | 6  | Deinzer et al. (2016.2)   | 2016 | plaque  | secondary | MPI   | Fones   | 32 | 36.78 | 23.99 | 1   | 1            | Bass  | 30 | 39.24 | 23.41 |
| 12 | 7  | Harnacke et al. (2016)    | 2016 | plaque  | secondary | MPI   | Control | 22 | 77.45 | 12.08 | 1   | 1            | Fones | 23 | 70.67 | 14.49 |
| 13 | 7  | Harnacke et al. (2016)    | 2016 | plaque  | secondary | MPI   | Control | 22 | 77.45 | 12.08 | 1   | 1            | Bass  | 23 | 76.05 | 17.26 |
| 14 | 7  | Harnacke et al. (2016)    | 2016 | plaque  | secondary | MPI   | Fones   | 23 | 70.67 | 14.49 | 1   | 1            | Bass  | 23 | 76.05 | 17.26 |
| 15 | 8  | Ceyhan et al. (2018.1)    | 2018 | plaque  | secondary | PI    | Scrub   | 17 | 0.3   | 0.04  | 2   | 3            | Fones | 21 | 0.25  | 0.04  |
| 16 | 9  | Ceyhan et al. (2018.2)    | 2018 | plaque  | secondary | PI    | Scrub   | 22 | 0.37  | 0.03  | 2   | 3            | Fones | 25 | 0.47  | 0.04  |
| 17 | 10 | Ceyhan et al. (2018.3)    | 2018 | plaque  | secondary | PI    | Scrub   | 39 | 0.23  | 0.02  | 2   | 3            | Fones | 39 | 0.18  | 0.02  |

Node size by: Sample size    Node color by: Risk of Bias    Edge width by: Sample Size    Edge color by: Average RoB

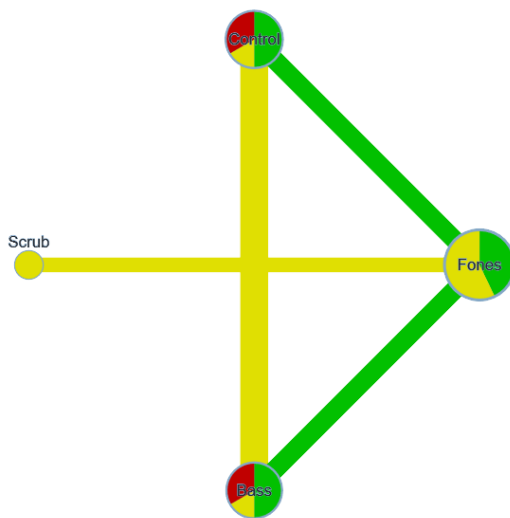

**Risk of bias contributions:** The bar chart shows the contributions of each piece of study to the network estimate

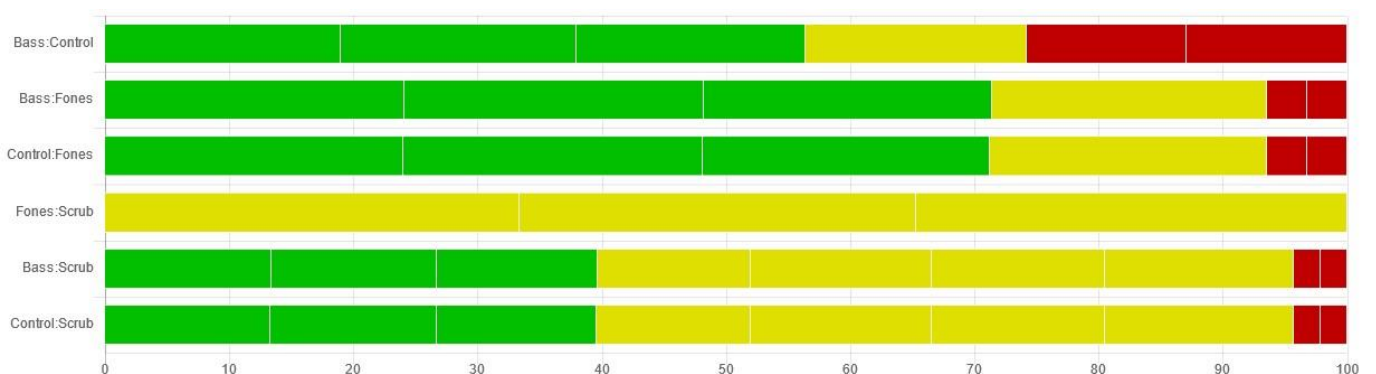

**Selected Rule: Average RoB**

|                                                                                                                                                                                                                       |                                                                                                                                                                                                                 |                                                                                                                                                                                                                    |                                                                                                                                                                                                                        |                                                                                                                                                                                                                          |
|-----------------------------------------------------------------------------------------------------------------------------------------------------------------------------------------------------------------------|-----------------------------------------------------------------------------------------------------------------------------------------------------------------------------------------------------------------|--------------------------------------------------------------------------------------------------------------------------------------------------------------------------------------------------------------------|------------------------------------------------------------------------------------------------------------------------------------------------------------------------------------------------------------------------|--------------------------------------------------------------------------------------------------------------------------------------------------------------------------------------------------------------------------|
| <b>Comparison</b> Bass:Control<br><b>Evidence: mixed</b><br>Majority RoB: No concerns<br>Average RoB: <b>Some concerns</b><br>Highest RoB: Major concerns<br>NMA judgment: <input type="text" value="Some concerns"/> | <b>Comparison</b> Bass:Fones<br><b>Evidence: mixed</b><br>Majority RoB: No concerns<br>Average RoB: <b>No concerns</b><br>Highest RoB: Major concerns<br>NMA judgment: <input type="text" value="No concerns"/> | <b>Comparison</b> Control:Fones<br><b>Evidence: mixed</b><br>Majority RoB: No concerns<br>Average RoB: <b>No concerns</b><br>Highest RoB: Major concerns<br>NMA judgment: <input type="text" value="No concerns"/> | <b>Comparison</b> Fones:Scrub<br><b>Evidence: mixed</b><br>Majority RoB: Some concerns<br>Average RoB: <b>Some concerns</b><br>Highest RoB: Major concerns<br>NMA judgment: <input type="text" value="Some concerns"/> | <b>Comparison</b> Bass:Scrub<br><b>Evidence: indirect</b><br>Majority RoB: Some concerns<br>Average RoB: <b>Some concerns</b><br>Highest RoB: Major concerns<br>NMA judgment: <input type="text" value="Some concerns"/> |
|-----------------------------------------------------------------------------------------------------------------------------------------------------------------------------------------------------------------------|-----------------------------------------------------------------------------------------------------------------------------------------------------------------------------------------------------------------|--------------------------------------------------------------------------------------------------------------------------------------------------------------------------------------------------------------------|------------------------------------------------------------------------------------------------------------------------------------------------------------------------------------------------------------------------|--------------------------------------------------------------------------------------------------------------------------------------------------------------------------------------------------------------------------|

**Reporting Bias**

The Comparison Control:Scrub was manually set to high risk (rationale: statistics from Sarvia et al. 1989 was not available for NMA)

|                                                                                                                             |                                                                                                                                 |                                                                                                                             |                                                                                                                            |
|-----------------------------------------------------------------------------------------------------------------------------|---------------------------------------------------------------------------------------------------------------------------------|-----------------------------------------------------------------------------------------------------------------------------|----------------------------------------------------------------------------------------------------------------------------|
| <b>Comparison</b> Bass:Control<br><b>Evidence: direct</b><br>Reporting bias judgment: <input type="text" value="Low risk"/> | <b>Comparison</b> Bass:Fones<br><b>Evidence: mixed</b><br>Reporting bias judgment: <input type="text" value="Low risk"/>        | <b>Comparison</b> Control:Fones<br><b>Evidence: mixed</b><br>Reporting bias judgment: <input type="text" value="Low risk"/> | <b>Comparison</b> Fones:Scrub<br><b>Evidence: direct</b><br>Reporting bias judgment: <input type="text" value="Low risk"/> |
| <b>Comparison</b> Bass:Scrub<br><b>Evidence: indirect</b><br>Reporting bias judgment: <input type="text" value="Low risk"/> | <b>Comparison</b> Control:Scrub<br><b>Evidence: indirect</b><br>Reporting bias judgment: <input type="text" value="High risk"/> |                                                                                                                             |                                                                                                                            |

**Indirectness contributions**

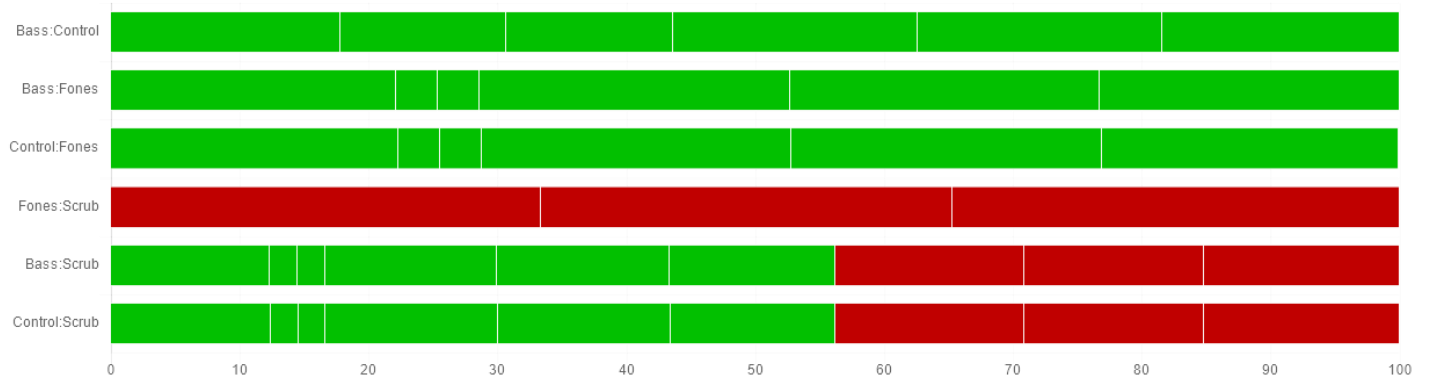

**Selected rule: Average; indirect comparisons were manually set at high risk**

|                                                                                                                                                                                                                |                                                                                                                                                                                                     |                                                                                                                                                                                                        |                                                                                                                                                                                                               |                                                                                                                                                                                                             |
|----------------------------------------------------------------------------------------------------------------------------------------------------------------------------------------------------------------|-----------------------------------------------------------------------------------------------------------------------------------------------------------------------------------------------------|--------------------------------------------------------------------------------------------------------------------------------------------------------------------------------------------------------|---------------------------------------------------------------------------------------------------------------------------------------------------------------------------------------------------------------|-------------------------------------------------------------------------------------------------------------------------------------------------------------------------------------------------------------|
| <b>Comparison</b> Bass:Control<br><b>Evidence: mixed</b><br>Majority: No concerns<br>Average: <b>No concerns</b><br>Highest: Major concerns<br>NMA judgment: <input type="text" value="No concerns"/>          | <b>Comparison</b> Bass:Fones<br><b>Evidence: mixed</b><br>Majority: No concerns<br>Average: <b>No concerns</b><br>Highest: Major concerns<br>NMA judgment: <input type="text" value="No concerns"/> | <b>Comparison</b> Control:Fones<br><b>Evidence: mixed</b><br>Majority: No concerns<br>Average: <b>No concerns</b><br>Highest: Major concerns<br>NMA judgment: <input type="text" value="No concerns"/> | <b>Comparison</b> Fones:Scrub<br><b>Evidence: mixed</b><br>Majority: Major concerns<br>Average: <b>Major concerns</b><br>Highest: Major concerns<br>NMA judgment: <input type="text" value="Major concerns"/> | <b>Comparison</b> Bass:Scrub<br><b>Evidence: indirect</b><br>Majority: No concerns<br>Average: <b>Some concerns</b><br>Highest: Major concerns<br>NMA judgment: <input type="text" value="Major concerns"/> |
| <b>Comparison</b> Control:Scrub<br><b>Evidence: indirect</b><br>Majority: No concerns<br>Average: <b>Some concerns</b><br>Highest: Major concerns<br>NMA judgment: <input type="text" value="Major concerns"/> |                                                                                                                                                                                                     |                                                                                                                                                                                                        |                                                                                                                                                                                                               |                                                                                                                                                                                                             |

## Imprecision: Clinically important effect size set at 0.2

|                                                                                                                                                                                                                                                                                            |                                                                                                                                                                                                                                                                                      |                                                                                                                                                                                                                                                                                         |                                                                                                                                                                                                                                                                                        |                                                                                                                                                                                                                                                                                          |
|--------------------------------------------------------------------------------------------------------------------------------------------------------------------------------------------------------------------------------------------------------------------------------------------|--------------------------------------------------------------------------------------------------------------------------------------------------------------------------------------------------------------------------------------------------------------------------------------|-----------------------------------------------------------------------------------------------------------------------------------------------------------------------------------------------------------------------------------------------------------------------------------------|----------------------------------------------------------------------------------------------------------------------------------------------------------------------------------------------------------------------------------------------------------------------------------------|------------------------------------------------------------------------------------------------------------------------------------------------------------------------------------------------------------------------------------------------------------------------------------------|
| <p><b>Comparison</b> Bass:Control<br/><b>Evidence:</b> mixed</p> <p>NMA estimate: -0.196<br/>95% Confidence interval:<br/>Confidence interval (-0.974,0.582)<br/><i>extends into clinically important effects in both directions</i></p> <p>Imprecision judgment<br/>Major concerns</p>    | <p><b>Comparison</b> Bass:Fones<br/><b>Evidence:</b> mixed</p> <p>NMA estimate: 0.237<br/>95% Confidence interval:<br/>Confidence interval (-0.676,1.151)<br/><i>extends into clinically important effects in both directions</i></p> <p>Imprecision judgment<br/>Major concerns</p> | <p><b>Comparison</b> Control:Fones<br/><b>Evidence:</b> mixed</p> <p>NMA estimate: 0.433<br/>95% Confidence interval:<br/>Confidence interval (-0.480,1.347)<br/><i>extends into clinically important effects in both directions</i></p> <p>Imprecision judgment<br/>Major concerns</p> | <p><b>Comparison</b> Fones:Scrub<br/><b>Evidence:</b> mixed</p> <p>NMA estimate: -0.386<br/>95% Confidence interval:<br/>Confidence interval (-1.515,0.743)<br/><i>extends into clinically important effects in both directions</i></p> <p>Imprecision judgment<br/>Major concerns</p> | <p><b>Comparison</b> Bass:Scrub<br/><b>Evidence:</b> indirect</p> <p>NMA estimate: -0.149<br/>95% Confidence interval:<br/>Confidence interval (-1.601,1.303)<br/><i>extends into clinically important effects in both directions</i></p> <p>Imprecision judgment<br/>Major concerns</p> |
| <p><b>Comparison</b> Control:Scrub<br/><b>Evidence:</b> indirect</p> <p>NMA estimate: 0.047<br/>95% Confidence interval:<br/>Confidence interval (-1.405,1.499)<br/><i>extends into clinically important effects in both directions</i></p> <p>Imprecision judgment<br/>Major concerns</p> |                                                                                                                                                                                                                                                                                      |                                                                                                                                                                                                                                                                                         |                                                                                                                                                                                                                                                                                        |                                                                                                                                                                                                                                                                                          |

## Heterogeneity

The estimated value of between-study variance for the network meta-analysis is 0.865

|                                                                                                                                                                                                                                                                                                                                                                  |                                                                                                                                                                                                                                                                                                                                                            |                                                                                                                                                                                                                                                                                                                                                               |                                                                                                                                                                                                                                                                                                                                                              |                                                                                                                                                                                                                                                                                                                                                                |
|------------------------------------------------------------------------------------------------------------------------------------------------------------------------------------------------------------------------------------------------------------------------------------------------------------------------------------------------------------------|------------------------------------------------------------------------------------------------------------------------------------------------------------------------------------------------------------------------------------------------------------------------------------------------------------------------------------------------------------|---------------------------------------------------------------------------------------------------------------------------------------------------------------------------------------------------------------------------------------------------------------------------------------------------------------------------------------------------------------|--------------------------------------------------------------------------------------------------------------------------------------------------------------------------------------------------------------------------------------------------------------------------------------------------------------------------------------------------------------|----------------------------------------------------------------------------------------------------------------------------------------------------------------------------------------------------------------------------------------------------------------------------------------------------------------------------------------------------------------|
| <p><b>Comparison</b> Bass:Control<br/><b>Evidence:</b> mixed</p> <p>NMA estimate: -0.196<br/>95% intervals for NMA estimate<br/>Confidence interval: (-0.974,0.582)<br/>Prediction interval: (-2.483,2.091)<br/><i>Confidence and prediction intervals agree in relation to clinically important effect</i></p> <p>Heterogeneity judgment<br/>No concerns</p>    | <p><b>Comparison</b> Bass:Fones<br/><b>Evidence:</b> mixed</p> <p>NMA estimate: 0.237<br/>95% intervals for NMA estimate<br/>Confidence interval: (-0.676,1.151)<br/>Prediction interval: (-2.116,2.590)<br/><i>Confidence and prediction intervals agree in relation to clinically important effect</i></p> <p>Heterogeneity judgment<br/>No concerns</p> | <p><b>Comparison</b> Control:Fones<br/><b>Evidence:</b> mixed</p> <p>NMA estimate: 0.433<br/>95% intervals for NMA estimate<br/>Confidence interval: (-0.480,1.347)<br/>Prediction interval: (-1.920,2.786)<br/><i>Confidence and prediction intervals agree in relation to clinically important effect</i></p> <p>Heterogeneity judgment<br/>No concerns</p> | <p><b>Comparison</b> Fones:Scrub<br/><b>Evidence:</b> mixed</p> <p>NMA estimate: -0.386<br/>95% intervals for NMA estimate<br/>Confidence interval: (-1.515,0.743)<br/>Prediction interval: (-2.860,2.088)<br/><i>Confidence and prediction intervals agree in relation to clinically important effect</i></p> <p>Heterogeneity judgment<br/>No concerns</p> | <p><b>Comparison</b> Bass:Scrub<br/><b>Evidence:</b> indirect</p> <p>NMA estimate: -0.149<br/>95% intervals for NMA estimate<br/>Confidence interval: (-1.601,1.303)<br/>Prediction interval: (-2.838,2.541)<br/><i>Confidence and prediction intervals agree in relation to clinically important effect</i></p> <p>Heterogeneity judgment<br/>No concerns</p> |
| <p><b>Comparison</b> Control:Scrub<br/><b>Evidence:</b> indirect</p> <p>NMA estimate: 0.047<br/>95% intervals for NMA estimate<br/>Confidence interval: (-1.405,1.499)<br/>Prediction interval: (-2.643,2.736)<br/><i>Confidence and prediction intervals agree in relation to clinically important effect</i></p> <p>Heterogeneity judgment<br/>No concerns</p> |                                                                                                                                                                                                                                                                                                                                                            |                                                                                                                                                                                                                                                                                                                                                               |                                                                                                                                                                                                                                                                                                                                                              |                                                                                                                                                                                                                                                                                                                                                                |

## Incoherence

Global test based on a random-effects design-by-treatment interaction model

$\chi^2$  statistic: 0.073 (1 degrees of freedom), P value: 0.787

|                                                                                                                                                                                                                             |                                                                                                                                                                                                                                                                                                                                                                                                                            |                                                                                                                                                                                                                                                                                                                                                                                                                               |                                                                                                                                                                                                                          |
|-----------------------------------------------------------------------------------------------------------------------------------------------------------------------------------------------------------------------------|----------------------------------------------------------------------------------------------------------------------------------------------------------------------------------------------------------------------------------------------------------------------------------------------------------------------------------------------------------------------------------------------------------------------------|-------------------------------------------------------------------------------------------------------------------------------------------------------------------------------------------------------------------------------------------------------------------------------------------------------------------------------------------------------------------------------------------------------------------------------|--------------------------------------------------------------------------------------------------------------------------------------------------------------------------------------------------------------------------|
| <p><b>Comparison</b> Bass:Control<br/><b>Evidence:</b> direct</p> <p>Direct standardised mean difference: -0.196(-0.974,0.583)<br/>Inconsistency measures: Not applicable</p> <p>Incoherence judgment<br/>No concerns</p>   | <p><b>Comparison</b> Bass:Fones<br/><b>Evidence:</b> mixed</p> <p>NMA standardised mean difference: 0.237(-0.676,1.151)<br/>Direct standardised mean difference: 0.277(-0.677,1.232)<br/>Indirect standardised mean difference: -0.204(-3.365,2.958)</p> <p>Inconsistency measures<br/>Difference of standardised mean differences: 0.481(-2.821,3.783)<br/>P value: 0.775</p> <p>Incoherence judgment<br/>No concerns</p> | <p><b>Comparison</b> Control:Fones<br/><b>Evidence:</b> mixed</p> <p>NMA standardised mean difference: 0.433(-0.480,1.347)<br/>Direct standardised mean difference: 0.394(-0.560,1.348)<br/>Indirect standardised mean difference: 0.864(-2.299,4.026)</p> <p>Inconsistency measures<br/>Difference of standardised mean differences: -0.470(-3.773,2.833)<br/>P value: 0.780</p> <p>Incoherence judgment<br/>No concerns</p> | <p><b>Comparison</b> Fones:Scrub<br/><b>Evidence:</b> direct</p> <p>Direct standardised mean difference: -0.386(-1.515,0.743)<br/>Inconsistency measures: Not applicable</p> <p>Incoherence judgment<br/>No concerns</p> |
| <p><b>Comparison</b> Bass:Scrub<br/><b>Evidence:</b> indirect</p> <p>Indirect standardised mean difference: -0.149(-1.601,1.303)<br/>Inconsistency measures: Not applicable</p> <p>Incoherence judgment<br/>No concerns</p> | <p><b>Comparison</b> Control:Scrub<br/><b>Evidence:</b> indirect</p> <p>Indirect standardised mean difference: 0.047(-1.405,1.499)<br/>Inconsistency measures: Not applicable</p> <p>Incoherence judgment<br/>No concerns</p>                                                                                                                                                                                              |                                                                                                                                                                                                                                                                                                                                                                                                                               |                                                                                                                                                                                                                          |

## Overall rating of the confidence into the evidence

| Comparison        | Number of Studies | Within-study bias | Reporting bias | Indirectness     | Imprecision      | Heterogeneity | Incoherence | Confidence rating | Reason(s) for downgrading                                       |
|-------------------|-------------------|-------------------|----------------|------------------|------------------|---------------|-------------|-------------------|-----------------------------------------------------------------|
| Mixed evidence    |                   |                   |                |                  |                  |               |             |                   |                                                                 |
| Bass vs Control   | 6                 | Some concerns ✓   | Low risk       | No concerns      | Major concerns ✓ | No concerns   | No concerns | Very low ▾        | Within-study bias   Imprecision                                 |
| Bass vs Fones     | 4                 | No concerns       | Low risk       | No concerns      | Major concerns ✓ | No concerns   | No concerns | Low ▾             | Imprecision                                                     |
| Control vs Fones  | 4                 | No concerns       | Low risk       | No concerns      | Major concerns ✓ | No concerns   | No concerns | Low ▾             | Imprecision                                                     |
| Fones vs Scrub    | 3                 | Some concerns ✓   | Low risk       | Major concerns ✓ | Major concerns ✓ | No concerns   | No concerns | Very low ▾        | Within-study bias   Indirectness   Imprecision                  |
| Indirect evidence |                   |                   |                |                  |                  |               |             |                   |                                                                 |
| Bass vs Scrub     | --                | Some concerns ✓   | Low risk       | Major concerns ✓ | Major concerns ✓ | No concerns   | No concerns | Very low ▾        | Within-study bias   Indirectness   Imprecision                  |
| Control vs Scrub  | --                | Some concerns ✓   | High risk ✓    | Major concerns ✓ | Major concerns ✓ | No concerns   | No concerns | Very low ▾        | Within-study bias   Reporting bias   Indirectness   Imprecision |

### 3. CINeMA-Output: Secondary Plaque (studies with adults only)

|    | id | study                     | year | feature | outcome   | index | t1      | n1 | y1    | sd1   | rob | indirectness | t2    | n2 | y2    | sd2   |
|----|----|---------------------------|------|---------|-----------|-------|---------|----|-------|-------|-----|--------------|-------|----|-------|-------|
| 1  | 2  | Harnacke et al. (2012)    | 2012 | plaque  | secondary | MPI   | Control | 19 | 62.51 | 20.05 | 2   | 1            | Fones | 18 | 50.19 | 15.33 |
| 2  | 2  | Harnacke et al. (2012)    | 2012 | plaque  | secondary | MPI   | Control | 19 | 62.51 | 20.05 | 2   | 1            | Bass  | 18 | 64.72 | 19.31 |
| 3  | 2  | Harnacke et al. (2012)    | 2012 | plaque  | secondary | MPI   | Fones   | 18 | 50.19 | 15.33 | 2   | 1            | Bass  | 18 | 64.72 | 19.31 |
| 4  | 3  | Schlueter et al. (2013.1) | 2013 | plaque  | secondary | TQHI  | Control | 27 | 1.8   | 0.47  | 3   | 1            | Bass  | 24 | 1.58  | 0.58  |
| 5  | 4  | Schlueter et al. (2013.2) | 2013 | plaque  | secondary | TQHI  | Control | 27 | 1.8   | 0.47  | 3   | 1            | Bass  | 26 | 1.64  | 0.58  |
| 6  | 5  | Deinzer et al. (2016.1)   | 2016 | plaque  | secondary | MPI   | Control | 30 | 76.18 | 14.93 | 1   | 1            | Fones | 32 | 71.99 | 14.92 |
| 7  | 5  | Deinzer et al. (2016.1)   | 2016 | plaque  | secondary | MPI   | Control | 30 | 76.18 | 14.93 | 1   | 1            | Bass  | 30 | 70.56 | 16.9  |
| 8  | 5  | Deinzer et al. (2016.1)   | 2016 | plaque  | secondary | MPI   | Fones   | 32 | 71.99 | 14.92 | 1   | 1            | Bass  | 30 | 70.56 | 16.9  |
| 9  | 6  | Deinzer et al. (2016.2)   | 2016 | plaque  | secondary | MPI   | Control | 30 | 42.18 | 25.56 | 1   | 1            | Fones | 32 | 36.78 | 23.99 |
| 10 | 6  | Deinzer et al. (2016.2)   | 2016 | plaque  | secondary | MPI   | Control | 30 | 42.18 | 25.56 | 1   | 1            | Bass  | 30 | 39.24 | 23.41 |
| 11 | 6  | Deinzer et al. (2016.2)   | 2016 | plaque  | secondary | MPI   | Fones   | 32 | 36.78 | 23.99 | 1   | 1            | Bass  | 30 | 39.24 | 23.41 |
| 12 | 7  | Harnacke et al. (2016)    | 2016 | plaque  | secondary | MPI   | Control | 22 | 77.45 | 12.08 | 1   | 1            | Fones | 23 | 70.67 | 14.49 |
| 13 | 7  | Harnacke et al. (2016)    | 2016 | plaque  | secondary | MPI   | Control | 22 | 77.45 | 12.08 | 1   | 1            | Bass  | 23 | 76.05 | 17.26 |
| 14 | 7  | Harnacke et al. (2016)    | 2016 | plaque  | secondary | MPI   | Fones   | 23 | 70.67 | 14.49 | 1   | 1            | Bass  | 23 | 76.05 | 17.26 |

Node size by:  Node color by:  Edge width by:  Edge color by:

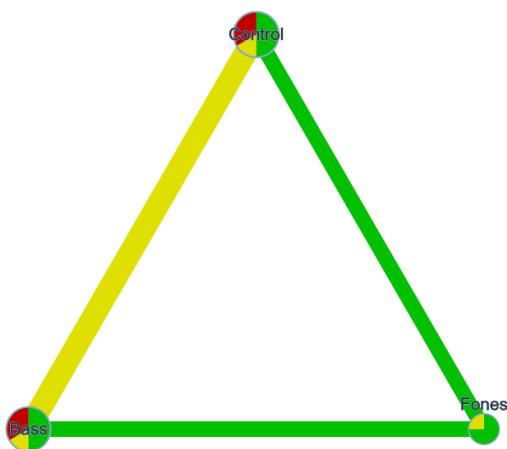

**Risk of bias contributions:** The bar chart shows the contributions of each piece of study to the network estimate

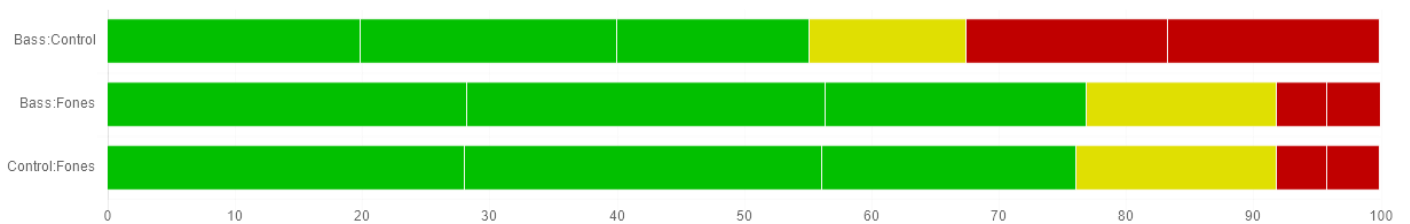

**Selected Rule: Average RoB**

|                                                                                                                                                                                                                                                 |                                                                                                                                                                                                                                           |                                                                                                                                                                                                                                              |
|-------------------------------------------------------------------------------------------------------------------------------------------------------------------------------------------------------------------------------------------------|-------------------------------------------------------------------------------------------------------------------------------------------------------------------------------------------------------------------------------------------|----------------------------------------------------------------------------------------------------------------------------------------------------------------------------------------------------------------------------------------------|
| <p><b>Comparison</b> Bass:Control</p> <p><b>Evidence: mixed</b></p> <p>Majority RoB: No concerns</p> <p>Average RoB: <b>Some concerns</b></p> <p>Highest RoB: Major concerns</p> <p>NMA judgment <input type="text" value="Some concerns"/></p> | <p><b>Comparison</b> Bass:Fones</p> <p><b>Evidence: mixed</b></p> <p>Majority RoB: No concerns</p> <p>Average RoB: <b>No concerns</b></p> <p>Highest RoB: Major concerns</p> <p>NMA judgment <input type="text" value="No concerns"/></p> | <p><b>Comparison</b> Control:Fones</p> <p><b>Evidence: mixed</b></p> <p>Majority RoB: No concerns</p> <p>Average RoB: <b>No concerns</b></p> <p>Highest RoB: Major concerns</p> <p>NMA judgment <input type="text" value="No concerns"/></p> |
|-------------------------------------------------------------------------------------------------------------------------------------------------------------------------------------------------------------------------------------------------|-------------------------------------------------------------------------------------------------------------------------------------------------------------------------------------------------------------------------------------------|----------------------------------------------------------------------------------------------------------------------------------------------------------------------------------------------------------------------------------------------|

**Reporting Bias:** Judgement „all low Risk“

**Indirectness:** Judgement “all no concerns”



**Imprecision:** Clinically important effect size set at 0.2

|                                                                                                                                                                                                                                                                                                                                  |                                                                                                                                                                                                                                                                                                                               |                                                                                                                                                                                                                                                                                                                                |
|----------------------------------------------------------------------------------------------------------------------------------------------------------------------------------------------------------------------------------------------------------------------------------------------------------------------------------|-------------------------------------------------------------------------------------------------------------------------------------------------------------------------------------------------------------------------------------------------------------------------------------------------------------------------------|--------------------------------------------------------------------------------------------------------------------------------------------------------------------------------------------------------------------------------------------------------------------------------------------------------------------------------|
| <p><b>Comparison</b> Bass:Control</p> <p><b>Evidence: mixed</b></p> <p>NMA estimate: <b>-0.213</b></p> <p>95% Confidence interval:<br/> <i>Confidence interval</i> <b>(-0.439,0.012)</b><br/> <i>extends into clinically important effects</i></p> <p>Imprecision judgment<br/> <input type="button" value="Some concerns"/></p> | <p><b>Comparison</b> Bass:Fones</p> <p><b>Evidence: mixed</b></p> <p>NMA estimate: <b>0.174</b></p> <p>95% Confidence interval:<br/> <i>Confidence interval</i> <b>(-0.090,0.438)</b><br/> <i>extends into clinically important effects</i></p> <p>Imprecision judgment<br/> <input type="button" value="Some concerns"/></p> | <p><b>Comparison</b> Control:Fones</p> <p><b>Evidence: mixed</b></p> <p>NMA estimate: <b>0.387</b></p> <p>95% Confidence interval:<br/> <i>Confidence interval</i> <b>(0.123,0.651)</b><br/> <i>does not cross clinically important effect</i></p> <p>Imprecision judgment<br/> <input type="button" value="No concerns"/></p> |
|----------------------------------------------------------------------------------------------------------------------------------------------------------------------------------------------------------------------------------------------------------------------------------------------------------------------------------|-------------------------------------------------------------------------------------------------------------------------------------------------------------------------------------------------------------------------------------------------------------------------------------------------------------------------------|--------------------------------------------------------------------------------------------------------------------------------------------------------------------------------------------------------------------------------------------------------------------------------------------------------------------------------|

### Heterogeneity

The estimated value of between-study variance for the network meta-analysis is **0.000**

|                                                                                                                                                                                                                                                                                                                                                                                                                               |                                                                                                                                                                                                                                                                                                                                                                                                                            |                                                                                                                                                                                                                                                                                                                                                                                                                             |
|-------------------------------------------------------------------------------------------------------------------------------------------------------------------------------------------------------------------------------------------------------------------------------------------------------------------------------------------------------------------------------------------------------------------------------|----------------------------------------------------------------------------------------------------------------------------------------------------------------------------------------------------------------------------------------------------------------------------------------------------------------------------------------------------------------------------------------------------------------------------|-----------------------------------------------------------------------------------------------------------------------------------------------------------------------------------------------------------------------------------------------------------------------------------------------------------------------------------------------------------------------------------------------------------------------------|
| <p><b>Comparison</b> Bass:Control</p> <p><b>Evidence: mixed</b></p> <p>NMA estimate: <b>-0.213</b></p> <p>95% intervals for NMA estimate<br/> Confidence interval: <b>(-0.439,0.012)</b><br/> Prediction interval: <b>(-0.485,0.058)</b></p> <p><i>Confidence and prediction intervals agree in relation to clinically important effect</i></p> <p>Heterogeneity judgment<br/> <input type="button" value="No concerns"/></p> | <p><b>Comparison</b> Bass:Fones</p> <p><b>Evidence: mixed</b></p> <p>NMA estimate: <b>0.174</b></p> <p>95% intervals for NMA estimate<br/> Confidence interval: <b>(-0.090,0.438)</b><br/> Prediction interval: <b>(-0.144,0.492)</b></p> <p><i>Confidence and prediction intervals agree in relation to clinically important effect</i></p> <p>Heterogeneity judgment<br/> <input type="button" value="No concerns"/></p> | <p><b>Comparison</b> Control:Fones</p> <p><b>Evidence: mixed</b></p> <p>NMA estimate: <b>0.387</b></p> <p>95% intervals for NMA estimate<br/> Confidence interval: <b>(0.123,0.651)</b><br/> Prediction interval: <b>(0.069,0.706)</b></p> <p><i>Confidence and prediction intervals agree in relation to clinically important effect</i></p> <p>Heterogeneity judgment<br/> <input type="button" value="No concerns"/></p> |
|-------------------------------------------------------------------------------------------------------------------------------------------------------------------------------------------------------------------------------------------------------------------------------------------------------------------------------------------------------------------------------------------------------------------------------|----------------------------------------------------------------------------------------------------------------------------------------------------------------------------------------------------------------------------------------------------------------------------------------------------------------------------------------------------------------------------------------------------------------------------|-----------------------------------------------------------------------------------------------------------------------------------------------------------------------------------------------------------------------------------------------------------------------------------------------------------------------------------------------------------------------------------------------------------------------------|

### Incoherence

Global test based on a random-effects design-by-treatment interaction model

$\chi^2$  statistic: **0.767** (1 degrees of freedom), P value: **0.381**

|                                                                                                                                                                                                                                                                        |                                                                                                                                                                                                                                                                                                                                                                                                                                                                                                      |                                                                                                                                                                                                                                                                                                                                                                                                                                                                                                       |
|------------------------------------------------------------------------------------------------------------------------------------------------------------------------------------------------------------------------------------------------------------------------|------------------------------------------------------------------------------------------------------------------------------------------------------------------------------------------------------------------------------------------------------------------------------------------------------------------------------------------------------------------------------------------------------------------------------------------------------------------------------------------------------|-------------------------------------------------------------------------------------------------------------------------------------------------------------------------------------------------------------------------------------------------------------------------------------------------------------------------------------------------------------------------------------------------------------------------------------------------------------------------------------------------------|
| <p><b>Comparison</b> Bass:Control</p> <p><b>Evidence: direct</b></p> <p>Direct standardised mean difference: <b>-0.212(-0.437,0.013)</b></p> <p>Inconsistency measures: Not applicable</p> <p>Incoherence judgment<br/> <input type="button" value="No concerns"/></p> | <p><b>Comparison</b> Bass:Fones</p> <p><b>Evidence: mixed</b></p> <p>NMA standardised mean difference: <b>0.174(-0.090,0.438)</b><br/> Direct standardised mean difference: <b>0.210(-0.066,0.485)</b><br/> Indirect standardised mean difference: <b>-0.213(-1.118,0.693)</b></p> <p>Inconsistency measures<br/> Difference of standardised mean differences: <b>0.423(-0.524,1.369)</b><br/> P value: <b>0.382</b></p> <p>Incoherence judgment<br/> <input type="button" value="No concerns"/></p> | <p><b>Comparison</b> Control:Fones</p> <p><b>Evidence: mixed</b></p> <p>NMA standardised mean difference: <b>0.387(0.123,0.651)</b><br/> Direct standardised mean difference: <b>0.359(0.083,0.635)</b><br/> Indirect standardised mean difference: <b>0.690(-0.211,1.590)</b></p> <p>Inconsistency measures<br/> Difference of standardised mean differences: <b>-0.331(-1.272,0.611)</b><br/> P value: <b>0.491</b></p> <p>Incoherence judgment<br/> <input type="button" value="No concerns"/></p> |
|------------------------------------------------------------------------------------------------------------------------------------------------------------------------------------------------------------------------------------------------------------------------|------------------------------------------------------------------------------------------------------------------------------------------------------------------------------------------------------------------------------------------------------------------------------------------------------------------------------------------------------------------------------------------------------------------------------------------------------------------------------------------------------|-------------------------------------------------------------------------------------------------------------------------------------------------------------------------------------------------------------------------------------------------------------------------------------------------------------------------------------------------------------------------------------------------------------------------------------------------------------------------------------------------------|

### Overall rating of the confidence into the evidence

| Comparison       | Number of Studies | Within-study bias | Reporting bias | Indirectness | Imprecision   | Heterogeneity | Incoherence | Confidence rating | Reason(s) for downgrading       |
|------------------|-------------------|-------------------|----------------|--------------|---------------|---------------|-------------|-------------------|---------------------------------|
| Mixed evidence   |                   |                   |                |              |               |               |             |                   |                                 |
| Bass vs Control  | 6                 | Some concerns     | Low risk       | No concerns  | Some concerns | No concerns   | No concerns | Low               | Within-study bias   Imprecision |
| Bass vs Fones    | 4                 | No concerns       | Low risk       | No concerns  | Some concerns | No concerns   | No concerns | Moderate          | Imprecision                     |
| Control vs Fones | 4                 | No concerns       | Low risk       | No concerns  | No concerns   | No concerns   | No concerns | High              |                                 |

#### 4. CINeMA-Output: Primary Gingivitis (all studies)

|   | study                    | year | feature    | outcome | index | t1      | n1 | y1    | sd1   | rob | indirectness | t2    | n2 | y2    | sd2   |
|---|--------------------------|------|------------|---------|-------|---------|----|-------|-------|-----|--------------|-------|----|-------|-------|
| 1 | Smutkeeree et al. (2011) | 2011 | gingivitis | primary | GI    | Scrub   | 29 | 2.42  | 0.28  | 3   | 3            | Bass  | 28 | 2.43  | 0.34  |
| 2 | Harnacke et al. (2012)   | 2012 | gingivitis | primary | PBI   | Control | 19 | 26    | 15.03 | 2   | 1            | Fones | 19 | 15.35 | 12.57 |
| 3 | Harnacke et al. (2012)   | 2012 | gingivitis | primary | PBI   | Control | 19 | 26    | 15.03 | 2   | 1            | Bass  | 18 | 27.96 | 21.29 |
| 4 | Harnacke et al. (2012)   | 2012 | gingivitis | primary | PBI   | Fones   | 19 | 15.35 | 12.57 | 2   | 1            | Bass  | 18 | 27.96 | 21.29 |
| 5 | Harnacke et al. (2016)   | 2016 | gingivitis | primary | BOP   | Control | 22 | 7.36  | 4.7   | 1   | 1            | Fones | 23 | 10.5  | 7.39  |
| 6 | Harnacke et al. (2016)   | 2016 | gingivitis | primary | BOP   | Control | 22 | 7.36  | 4.7   | 1   | 1            | Bass  | 24 | 10.84 | 7.01  |
| 7 | Harnacke et al. (2016)   | 2016 | gingivitis | primary | BOP   | Fones   | 23 | 10.5  | 7.39  | 1   | 1            | Bass  | 24 | 10.84 | 7.01  |
| 8 | Schmalz et al. (2018)    | 2018 | gingivitis | primary | GI    | Control | 22 | 1     | 0.08  | 2   | 2            | Fones | 22 | 0.97  | 0.14  |

Node size by: Sample size    Node color by: Risk of Bias    Edge width by: Sample Size    Edge color by: Average RoB

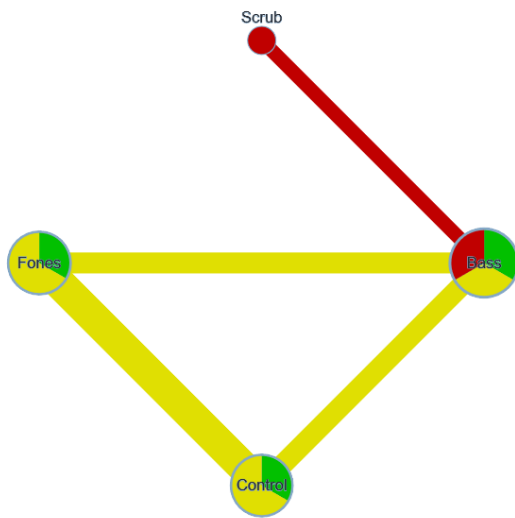

**Risk of bias contributions:** The bar chart shows the contributions of each piece of study to the network estimate

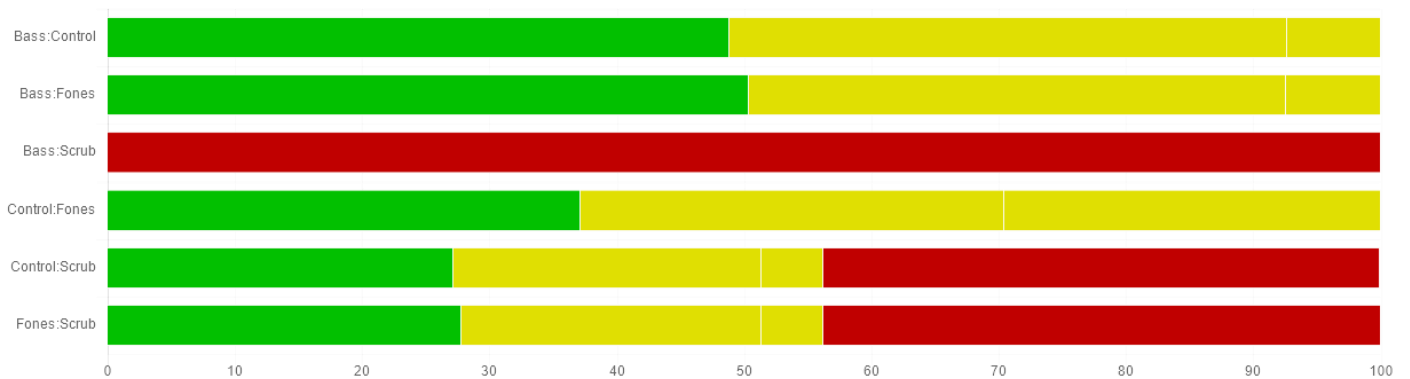

**Selected Rule: Average RoB**

|                                                                                                                                                                                                            |                                                                                                                                                                                                 |                                                                                                                                                                                                          |                                                                                                                                                                                                          |                                                                                                                                                                                                              |
|------------------------------------------------------------------------------------------------------------------------------------------------------------------------------------------------------------|-------------------------------------------------------------------------------------------------------------------------------------------------------------------------------------------------|----------------------------------------------------------------------------------------------------------------------------------------------------------------------------------------------------------|----------------------------------------------------------------------------------------------------------------------------------------------------------------------------------------------------------|--------------------------------------------------------------------------------------------------------------------------------------------------------------------------------------------------------------|
| <b>Comparison</b> Bass:Control<br><b>Evidence:</b> mixed<br>Majority RoB: Some concerns<br>Average RoB: <b>Some concerns</b><br>Highest RoB: Major concerns<br>NMA judgment: <span>Some concerns</span>    | <b>Comparison</b> Bass:Fones<br><b>Evidence:</b> mixed<br>Majority RoB: No concerns<br>Average RoB: <b>No concerns</b><br>Highest RoB: Major concerns<br>NMA judgment: <span>No concerns</span> | <b>Comparison</b> Bass:Scrub<br><b>Evidence:</b> mixed<br>Majority RoB: Major concerns<br>Average RoB: <b>Major concerns</b><br>Highest RoB: Major concerns<br>NMA judgment: <span>Major concerns</span> | <b>Comparison</b> Control:Fones<br><b>Evidence:</b> mixed<br>Majority RoB: Some concerns<br>Average RoB: <b>Some concerns</b><br>Highest RoB: Major concerns<br>NMA judgment: <span>Some concerns</span> | <b>Comparison</b> Control:Scrub<br><b>Evidence:</b> indirect<br>Majority RoB: Major concerns<br>Average RoB: <b>Some concerns</b><br>Highest RoB: Major concerns<br>NMA judgment: <span>Some concerns</span> |
| <b>Comparison</b> Fones:Scrub<br><b>Evidence:</b> indirect<br>Majority RoB: Major concerns<br>Average RoB: <b>Some concerns</b><br>Highest RoB: Major concerns<br>NMA judgment: <span>Some concerns</span> |                                                                                                                                                                                                 |                                                                                                                                                                                                          |                                                                                                                                                                                                          |                                                                                                                                                                                                              |

**Reporting Bias:** The Comparison Bass:Control was manually set to high risk (rationale: statistics from Dosumo et al. 2019 and Ausenda et al. 2019 were not available for NMA)

|                                                                                                     |                                                                                                   |                                                                                                |                                                                                                   |
|-----------------------------------------------------------------------------------------------------|---------------------------------------------------------------------------------------------------|------------------------------------------------------------------------------------------------|---------------------------------------------------------------------------------------------------|
| <b>Comparison</b> Bass:Control<br><b>Evidence:</b> mixed<br>Reporting bias judgment<br>High risk    | <b>Comparison</b> Bass:Fones<br><b>Evidence:</b> mixed<br>Reporting bias judgment<br>Low risk     | <b>Comparison</b> Bass:Scrub<br><b>Evidence:</b> direct<br>Reporting bias judgment<br>Low risk | <b>Comparison</b> Control:Fones<br><b>Evidence:</b> direct<br>Reporting bias judgment<br>Low risk |
| <b>Comparison</b> Control:Scrub<br><b>Evidence:</b> indirect<br>Reporting bias judgment<br>Low risk | <b>Comparison</b> Fones:Scrub<br><b>Evidence:</b> indirect<br>Reporting bias judgment<br>Low risk |                                                                                                |                                                                                                   |

**Indirectness contributions**

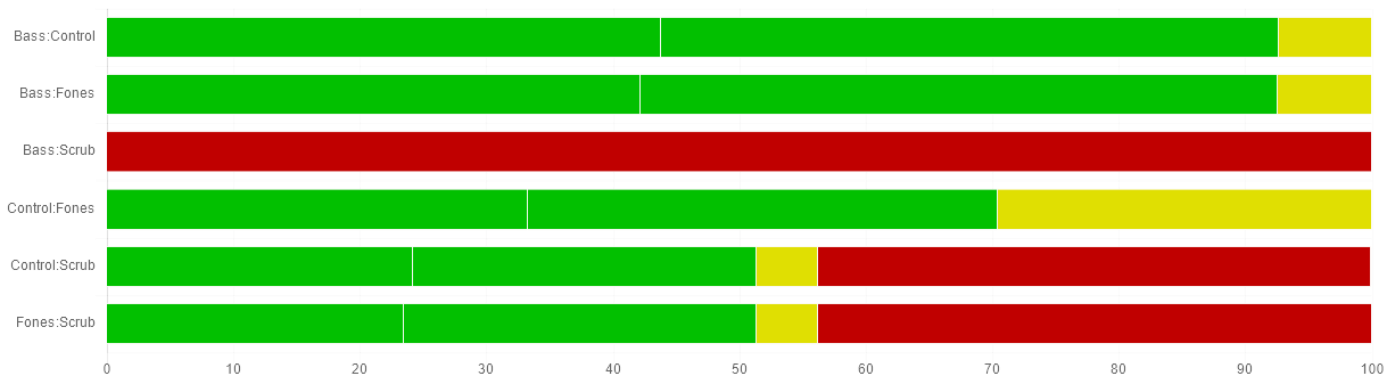

**Selected rule:** Average; indirect comparisons were manually set at high risk

|                                                                                                                                                                          |                                                                                                                                                                 |                                                                                                                                                                          |                                                                                                                                                                    |                                                                                                                                                                            |
|--------------------------------------------------------------------------------------------------------------------------------------------------------------------------|-----------------------------------------------------------------------------------------------------------------------------------------------------------------|--------------------------------------------------------------------------------------------------------------------------------------------------------------------------|--------------------------------------------------------------------------------------------------------------------------------------------------------------------|----------------------------------------------------------------------------------------------------------------------------------------------------------------------------|
| <b>Comparison</b> Bass:Control<br><b>Evidence:</b> mixed<br>Majority: No concerns<br>Average: No concerns<br>Highest: Major concerns<br>NMA judgment: No concerns        | <b>Comparison</b> Bass:Fones<br><b>Evidence:</b> mixed<br>Majority: No concerns<br>Average: No concerns<br>Highest: Major concerns<br>NMA judgment: No concerns | <b>Comparison</b> Bass:Scrub<br><b>Evidence:</b> mixed<br>Majority: Major concerns<br>Average: Major concerns<br>Highest: Major concerns<br>NMA judgment: Major concerns | <b>Comparison</b> Control:Fones<br><b>Evidence:</b> mixed<br>Majority: No concerns<br>Average: No concerns<br>Highest: Major concerns<br>NMA judgment: No concerns | <b>Comparison</b> Control:Scrub<br><b>Evidence:</b> indirect<br>Majority: No concerns<br>Average: Some concerns<br>Highest: Major concerns<br>NMA judgment: Major concerns |
| <b>Comparison</b> Fones:Scrub<br><b>Evidence:</b> indirect<br>Majority: No concerns<br>Average: Some concerns<br>Highest: Major concerns<br>NMA judgment: Major concerns |                                                                                                                                                                 |                                                                                                                                                                          |                                                                                                                                                                    |                                                                                                                                                                            |

**Imprecision:** Clinically important effect size set at 0.2

|                                                                                                                                                                                                                                              |                                                                                                                                                                                                                                         |                                                                                                                                                                                                                                         |                                                                                                                                                                                                                                            |                                                                                                                                                                                                                                                |
|----------------------------------------------------------------------------------------------------------------------------------------------------------------------------------------------------------------------------------------------|-----------------------------------------------------------------------------------------------------------------------------------------------------------------------------------------------------------------------------------------|-----------------------------------------------------------------------------------------------------------------------------------------------------------------------------------------------------------------------------------------|--------------------------------------------------------------------------------------------------------------------------------------------------------------------------------------------------------------------------------------------|------------------------------------------------------------------------------------------------------------------------------------------------------------------------------------------------------------------------------------------------|
| <b>Comparison</b> Bass:Control<br><b>Evidence:</b> mixed<br>NMA estimate: 0.285<br>95% Confidence interval: (-0.327,0.898)<br>extends into clinically important effects in <b>both</b> directions<br>Imprecision judgment: Major concerns    | <b>Comparison</b> Bass:Fones<br><b>Evidence:</b> mixed<br>NMA estimate: 0.407<br>95% Confidence interval: (-0.206,1.021)<br>extends into clinically important effects in <b>both</b> directions<br>Imprecision judgment: Major concerns | <b>Comparison</b> Bass:Scrub<br><b>Evidence:</b> mixed<br>NMA estimate: 0.032<br>95% Confidence interval: (-0.811,0.875)<br>extends into clinically important effects in <b>both</b> directions<br>Imprecision judgment: Major concerns | <b>Comparison</b> Control:Fones<br><b>Evidence:</b> mixed<br>NMA estimate: 0.122<br>95% Confidence interval: (-0.400,0.644)<br>extends into clinically important effects in <b>both</b> directions<br>Imprecision judgment: Major concerns | <b>Comparison</b> Control:Scrub<br><b>Evidence:</b> indirect<br>NMA estimate: -0.254<br>95% Confidence interval: (-1.296,0.789)<br>extends into clinically important effects in <b>both</b> directions<br>Imprecision judgment: Major concerns |
| <b>Comparison</b> Fones:Scrub<br><b>Evidence:</b> indirect<br>NMA estimate: -0.376<br>95% Confidence interval: (-1.418,0.667)<br>extends into clinically important effects in <b>both</b> directions<br>Imprecision judgment: Major concerns |                                                                                                                                                                                                                                         |                                                                                                                                                                                                                                         |                                                                                                                                                                                                                                            |                                                                                                                                                                                                                                                |

## Heterogeneity

The estimated value of between-study variance for the network meta-analysis is **0.115**

|                                                                                                                                                                                                                                                                                                                                                                    |                                                                                                                                                                                                                                                                                                                                                               |                                                                                                                                                                                                                                                                                                                                                               |                                                                                                                                                                                                                                                                                                                                                                  |                                                                                                                                                                                                                                                                                                                                                                      |
|--------------------------------------------------------------------------------------------------------------------------------------------------------------------------------------------------------------------------------------------------------------------------------------------------------------------------------------------------------------------|---------------------------------------------------------------------------------------------------------------------------------------------------------------------------------------------------------------------------------------------------------------------------------------------------------------------------------------------------------------|---------------------------------------------------------------------------------------------------------------------------------------------------------------------------------------------------------------------------------------------------------------------------------------------------------------------------------------------------------------|------------------------------------------------------------------------------------------------------------------------------------------------------------------------------------------------------------------------------------------------------------------------------------------------------------------------------------------------------------------|----------------------------------------------------------------------------------------------------------------------------------------------------------------------------------------------------------------------------------------------------------------------------------------------------------------------------------------------------------------------|
| <p><b>Comparison</b> Bass:Control<br/><b>Evidence:</b> mixed</p> <p>NMA estimate: 0.285<br/>95% intervals for NMA estimate<br/>Confidence interval: (-0.327,0.898)<br/>Prediction interval: (-1.698,2.269)</p> <p><i>Confidence and prediction intervals agree in relation to clinically important effect</i></p> <p>Heterogeneity judgment<br/>No concerns</p>    | <p><b>Comparison</b> Bass:Fones<br/><b>Evidence:</b> mixed</p> <p>NMA estimate: 0.407<br/>95% intervals for NMA estimate<br/>Confidence interval: (-0.206,1.021)<br/>Prediction interval: (-1.578,2.392)</p> <p><i>Confidence and prediction intervals agree in relation to clinically important effect</i></p> <p>Heterogeneity judgment<br/>No concerns</p> | <p><b>Comparison</b> Bass:Scrub<br/><b>Evidence:</b> mixed</p> <p>NMA estimate: 0.032<br/>95% intervals for NMA estimate<br/>Confidence interval: (-0.811,0.875)<br/>Prediction interval: (-2.324,2.388)</p> <p><i>Confidence and prediction intervals agree in relation to clinically important effect</i></p> <p>Heterogeneity judgment<br/>No concerns</p> | <p><b>Comparison</b> Control:Fones<br/><b>Evidence:</b> mixed</p> <p>NMA estimate: 0.122<br/>95% intervals for NMA estimate<br/>Confidence interval: (-0.400,0.644)<br/>Prediction interval: (-1.732,1.976)</p> <p><i>Confidence and prediction intervals agree in relation to clinically important effect</i></p> <p>Heterogeneity judgment<br/>No concerns</p> | <p><b>Comparison</b> Control:Scrub<br/><b>Evidence:</b> indirect</p> <p>NMA estimate: -0.254<br/>95% intervals for NMA estimate<br/>Confidence interval: (-1.296,0.789)<br/>Prediction interval: (-2.966,2.459)</p> <p><i>Confidence and prediction intervals agree in relation to clinically important effect</i></p> <p>Heterogeneity judgment<br/>No concerns</p> |
| <p><b>Comparison</b> Fones:Scrub<br/><b>Evidence:</b> indirect</p> <p>NMA estimate: -0.376<br/>95% intervals for NMA estimate<br/>Confidence interval: (-1.418,0.667)<br/>Prediction interval: (-3.089,2.338)</p> <p><i>Confidence and prediction intervals agree in relation to clinically important effect</i></p> <p>Heterogeneity judgment<br/>No concerns</p> |                                                                                                                                                                                                                                                                                                                                                               |                                                                                                                                                                                                                                                                                                                                                               |                                                                                                                                                                                                                                                                                                                                                                  |                                                                                                                                                                                                                                                                                                                                                                      |

## Incoherence

Global test based on a random-effects design-by-treatment interaction model  
 $\chi^2$  statistic: 0.089 (1 degrees of freedom), P value: 0.766

|                                                                                                                                                                                                                                                                                                                                                                                                                                     |                                                                                                                                                                                                                                                                                                                                                                                                                                   |                                                                                                                                                                                                                        |                                                                                                                                                                                                                           |
|-------------------------------------------------------------------------------------------------------------------------------------------------------------------------------------------------------------------------------------------------------------------------------------------------------------------------------------------------------------------------------------------------------------------------------------|-----------------------------------------------------------------------------------------------------------------------------------------------------------------------------------------------------------------------------------------------------------------------------------------------------------------------------------------------------------------------------------------------------------------------------------|------------------------------------------------------------------------------------------------------------------------------------------------------------------------------------------------------------------------|---------------------------------------------------------------------------------------------------------------------------------------------------------------------------------------------------------------------------|
| <p><b>Comparison</b> Bass:Control<br/><b>Evidence:</b> mixed</p> <p>NMA standardised mean difference: 0.285(-0.327,0.898)<br/>Direct standardised mean difference: 0.329(-0.312,0.970)<br/>Indirect standardised mean difference: -0.180(-2.268,1.907)</p> <p><b>Inconsistency measures</b><br/>Difference of standardised mean differences: 0.509(-1.674,2.693)<br/>P value: 0.648</p> <p>Incoherence judgment<br/>No concerns</p> | <p><b>Comparison</b> Bass:Fones<br/><b>Evidence:</b> mixed</p> <p>NMA standardised mean difference: 0.407(-0.206,1.021)<br/>Direct standardised mean difference: 0.372(-0.270,1.014)<br/>Indirect standardised mean difference: 0.777(-1.305,2.859)</p> <p><b>Inconsistency measures</b><br/>Difference of standardised mean differences: -0.405(-2.584,1.774)<br/>P value: 0.715</p> <p>Incoherence judgment<br/>No concerns</p> | <p><b>Comparison</b> Bass:Scrub<br/><b>Evidence:</b> direct</p> <p>Direct standardised mean difference: 0.032(-0.811,0.875)<br/>Inconsistency measures: Not applicable</p> <p>Incoherence judgment<br/>No concerns</p> | <p><b>Comparison</b> Control:Fones<br/><b>Evidence:</b> direct</p> <p>Direct standardised mean difference: 0.123(-0.399,0.645)<br/>Inconsistency measures: Not applicable</p> <p>Incoherence judgment<br/>No concerns</p> |
| <p><b>Comparison</b> Control:Scrub<br/><b>Evidence:</b> indirect</p> <p>Indirect standardised mean difference: -0.254(-1.296,0.789)<br/>Inconsistency measures: Not applicable</p> <p>Incoherence judgment<br/>No concerns</p>                                                                                                                                                                                                      | <p><b>Comparison</b> Fones:Scrub<br/><b>Evidence:</b> indirect</p> <p>Indirect standardised mean difference: -0.376(-1.418,0.667)<br/>Inconsistency measures: Not applicable</p> <p>Incoherence judgment<br/>No concerns</p>                                                                                                                                                                                                      |                                                                                                                                                                                                                        |                                                                                                                                                                                                                           |

## Overall rating of the confidence into the evidence

| Comparison        | Number of Studies | Within-study bias | Reporting bias | Indirectness   | Imprecision    | Heterogeneity | Incoherence | Confidence rating | Reason(s) for downgrading                        |
|-------------------|-------------------|-------------------|----------------|----------------|----------------|---------------|-------------|-------------------|--------------------------------------------------|
| Mixed evidence    |                   |                   |                |                |                |               |             |                   |                                                  |
| Bass vs Control   | 2                 | Some concerns     | High risk      | No concerns    | Major concerns | No concerns   | No concerns | Very low          | Within-study bias   Reporting bias   Imprecision |
| Bass vs Fones     | 2                 | No concerns       | Low risk       | No concerns    | Major concerns | No concerns   | No concerns | Low               | Imprecision                                      |
| Bass vs Scrub     | 1                 | Major concerns    | Low risk       | Major concerns | Major concerns | No concerns   | No concerns | Very low          | Within-study bias   Indirectness   Imprecision   |
| Control vs Fones  | 3                 | Some concerns     | Low risk       | No concerns    | Major concerns | No concerns   | No concerns | Very low          | Within-study bias   Imprecision                  |
| Indirect evidence |                   |                   |                |                |                |               |             |                   |                                                  |
| Control vs Scrub  | --                | Some concerns     | Low risk       | Major concerns | Major concerns | No concerns   | No concerns | Very low          | Within-study bias   Indirectness   Imprecision   |
| Fones vs Scrub    | --                | Some concerns     | Low risk       | Major concerns | Major concerns | No concerns   | No concerns | Very low          | Within-study bias   Indirectness   Imprecision   |

## 5. CINeMA-Output: Primary Gingivitis (studies with adults only)

|   | study                  | year | feature    | outcome | index | t1      | n1 | y1    | sd1   | rob | indirectness | t2    | n2 | y2    | sd2   |
|---|------------------------|------|------------|---------|-------|---------|----|-------|-------|-----|--------------|-------|----|-------|-------|
| 1 | Harnacke et al. (2012) | 2012 | gingivitis | primary | PBI   | Control | 19 | 26    | 15.03 | 2   | 1            | Fones | 19 | 15.35 | 12.57 |
| 2 | Harnacke et al. (2012) | 2012 | gingivitis | primary | PBI   | Control | 19 | 26    | 15.03 | 2   | 1            | Bass  | 18 | 27.96 | 21.29 |
| 3 | Harnacke et al. (2012) | 2012 | gingivitis | primary | PBI   | Fones   | 19 | 15.35 | 12.57 | 2   | 1            | Bass  | 18 | 27.96 | 21.29 |
| 4 | Harnacke et al. (2016) | 2016 | gingivitis | primary | BOP   | Control | 22 | 7.36  | 4.7   | 1   | 1            | Fones | 23 | 10.5  | 7.39  |
| 5 | Harnacke et al. (2016) | 2016 | gingivitis | primary | BOP   | Control | 22 | 7.36  | 4.7   | 1   | 1            | Bass  | 24 | 10.84 | 7.01  |
| 6 | Harnacke et al. (2016) | 2016 | gingivitis | primary | BOP   | Fones   | 23 | 10.5  | 7.39  | 1   | 1            | Bass  | 24 | 10.84 | 7.01  |
| 7 | Schmalz et al. (2018)  | 2018 | gingivitis | primary | GI    | Control | 22 | 1     | 0.08  | 2   | 2            | Fones | 22 | 0.97  | 0.14  |

Node size by:  Node color by:  Edge width by:  Edge color by:

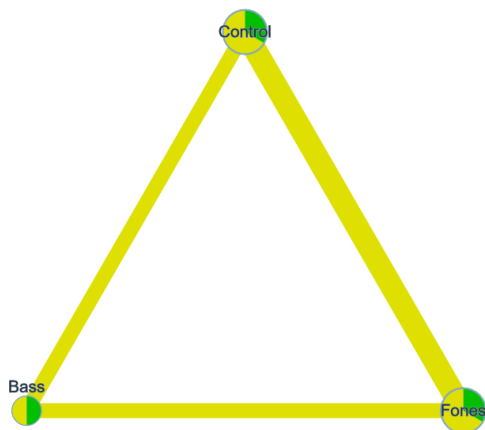

**Risk of bias contributions:** The bar chart shows the contributions of each piece of study to the network estimate

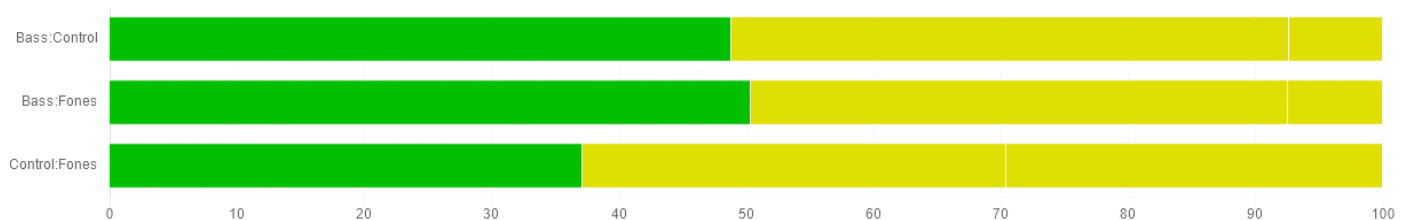

**Selected Rule:** Average RoB

| Comparison       | Bass:Control                               | Bass:Fones                               | Control:Fones                              |
|------------------|--------------------------------------------|------------------------------------------|--------------------------------------------|
| <b>Evidence:</b> | mixed                                      | mixed                                    | mixed                                      |
| Majority RoB:    | Some concerns                              | No concerns                              | Some concerns                              |
| Average RoB:     | Some concerns                              | No concerns                              | Some concerns                              |
| Highest RoB:     | Some concerns                              | Some concerns                            | Some concerns                              |
| NMA judgment     | <input type="text" value="Some concerns"/> | <input type="text" value="No concerns"/> | <input type="text" value="Some concerns"/> |

**Reporting Bias:** The Comparison Bass:Control was manually set to high risk (rationale: statistics from Dosumo et al. 2019 and Ausenda et al. 2019 were not available for NMA)

|                                                                                                  |                                                                                               |                                                                                                   |
|--------------------------------------------------------------------------------------------------|-----------------------------------------------------------------------------------------------|---------------------------------------------------------------------------------------------------|
| <b>Comparison</b> Bass:Control<br><b>Evidence: mixed</b><br>Reporting bias judgment<br>High risk | <b>Comparison</b> Bass:Fones<br><b>Evidence: mixed</b><br>Reporting bias judgment<br>Low risk | <b>Comparison</b> Control:Fones<br><b>Evidence: direct</b><br>Reporting bias judgment<br>Low risk |
|--------------------------------------------------------------------------------------------------|-----------------------------------------------------------------------------------------------|---------------------------------------------------------------------------------------------------|

**Indirectness contributions**

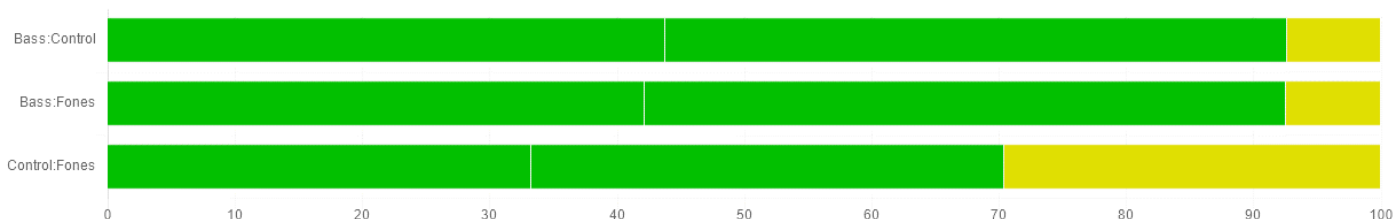

**Selected rule:** Average

|                                                                                                                                                                 |                                                                                                                                                               |                                                                                                                                                                  |
|-----------------------------------------------------------------------------------------------------------------------------------------------------------------|---------------------------------------------------------------------------------------------------------------------------------------------------------------|------------------------------------------------------------------------------------------------------------------------------------------------------------------|
| <b>Comparison</b> Bass:Control<br><b>Evidence: mixed</b><br>Majority: No concerns<br>Average: No concerns<br>Highest: Some concerns<br>NMA judgment No concerns | <b>Comparison</b> Bass:Fones<br><b>Evidence: mixed</b><br>Majority: No concerns<br>Average: No concerns<br>Highest: Some concerns<br>NMA judgment No concerns | <b>Comparison</b> Control:Fones<br><b>Evidence: mixed</b><br>Majority: No concerns<br>Average: No concerns<br>Highest: Some concerns<br>NMA judgment No concerns |
|-----------------------------------------------------------------------------------------------------------------------------------------------------------------|---------------------------------------------------------------------------------------------------------------------------------------------------------------|------------------------------------------------------------------------------------------------------------------------------------------------------------------|

**Imprecision:** Clinically important effect size set at 0.2

|                                                                                                                                                                                                                                                                           |                                                                                                                                                                                                                                                                         |                                                                                                                                                                                                                                                                            |
|---------------------------------------------------------------------------------------------------------------------------------------------------------------------------------------------------------------------------------------------------------------------------|-------------------------------------------------------------------------------------------------------------------------------------------------------------------------------------------------------------------------------------------------------------------------|----------------------------------------------------------------------------------------------------------------------------------------------------------------------------------------------------------------------------------------------------------------------------|
| <b>Comparison</b> Bass:Control<br><b>Evidence: mixed</b><br>NMA estimate: 0.285<br>95% Confidence interval:<br><i>Confidence interval (-0.327,0.898)</i><br>extends into clinically important effects in <b>both</b> directions<br>Imprecision judgment<br>Major concerns | <b>Comparison</b> Bass:Fones<br><b>Evidence: mixed</b><br>NMA estimate: 0.407<br>95% Confidence interval:<br><i>Confidence interval (-0.206,1.021)</i><br>extends into clinically important effects in <b>both</b> directions<br>Imprecision judgment<br>Major concerns | <b>Comparison</b> Control:Fones<br><b>Evidence: mixed</b><br>NMA estimate: 0.122<br>95% Confidence interval:<br><i>Confidence interval (-0.400,0.644)</i><br>extends into clinically important effects in <b>both</b> directions<br>Imprecision judgment<br>Major concerns |
|---------------------------------------------------------------------------------------------------------------------------------------------------------------------------------------------------------------------------------------------------------------------------|-------------------------------------------------------------------------------------------------------------------------------------------------------------------------------------------------------------------------------------------------------------------------|----------------------------------------------------------------------------------------------------------------------------------------------------------------------------------------------------------------------------------------------------------------------------|

## Heterogeneity

The estimated value of between-study variance for the network meta-analysis is **0.115**

| Comparison                                                                           | Bass:Control   | Comparison                                                                           | Bass:Fones     | Comparison                                                                           | Control:Fones  |
|--------------------------------------------------------------------------------------|----------------|--------------------------------------------------------------------------------------|----------------|--------------------------------------------------------------------------------------|----------------|
| Evidence: mixed                                                                      |                | Evidence: mixed                                                                      |                | Evidence: mixed                                                                      |                |
| NMA estimate:                                                                        | 0.285          | NMA estimate:                                                                        | 0.407          | NMA estimate:                                                                        | 0.122          |
| 95% intervals for NMA estimate                                                       |                | 95% intervals for NMA estimate                                                       |                | 95% intervals for NMA estimate                                                       |                |
| Confidence interval:                                                                 | (-0.327,0.898) | Confidence interval:                                                                 | (-0.206,1.021) | Confidence interval:                                                                 | (-0.400,0.644) |
| Prediction interval:                                                                 | (-1.698,2.269) | Prediction interval:                                                                 | (-1.578,2.392) | Prediction interval:                                                                 | (-1.732,1.976) |
| Confidence and prediction intervals agree in relation to clinically important effect |                | Confidence and prediction intervals agree in relation to clinically important effect |                | Confidence and prediction intervals agree in relation to clinically important effect |                |
| Heterogeneity judgment                                                               |                | Heterogeneity judgment                                                               |                | Heterogeneity judgment                                                               |                |
| No concerns                                                                          |                | No concerns                                                                          |                | No concerns                                                                          |                |

## Incoherence

Global test based on a random-effects design-by-treatment interaction model

$\chi^2$  statistic: 0.089 (1 degrees of freedom), P value: 0.766

| Comparison                                   | Bass:Control         | Comparison                                   | Bass:Fones           | Comparison                             | Control:Fones       |
|----------------------------------------------|----------------------|----------------------------------------------|----------------------|----------------------------------------|---------------------|
| Evidence: mixed                              |                      | Evidence: mixed                              |                      | Evidence: direct                       |                     |
| NMA standardised mean difference:            | 0.285(-0.327,0.898)  | NMA standardised mean difference:            | 0.407(-0.206,1.021)  | Direct standardised mean difference:   | 0.123(-0.399,0.645) |
| Direct standardised mean difference:         | 0.329(-0.312,0.970)  | Direct standardised mean difference:         | 0.372(-0.270,1.014)  | Inconsistency measures: Not applicable |                     |
| Indirect standardised mean difference:       | -0.180(-2.268,1.907) | Indirect standardised mean difference:       | 0.777(-1.305,2.859)  | Incoherence judgment                   | No concerns         |
| Inconsistency measures                       |                      | Inconsistency measures                       |                      | Incoherence judgment                   |                     |
| Difference of standardised mean differences: | 0.509(-1.674,2.693)  | Difference of standardised mean differences: | -0.405(-2.584,1.774) |                                        |                     |
| P value:                                     | 0.648                | P value:                                     | 0.715                |                                        |                     |
| Incoherence judgment                         |                      | Incoherence judgment                         |                      | Incoherence judgment                   |                     |
| No concerns                                  |                      | No concerns                                  |                      | No concerns                            |                     |

## Overall rating of the confidence into the evidence

| Comparison       | Number of Studies | Within-study bias | Reporting bias | Indirectness | Imprecision    | Heterogeneity | Incoherence | Confidence rating | Reason(s) for downgrading                        |
|------------------|-------------------|-------------------|----------------|--------------|----------------|---------------|-------------|-------------------|--------------------------------------------------|
| Mixed evidence   |                   |                   |                |              |                |               |             |                   |                                                  |
| Bass vs Control  | 2                 | Some concerns     | High risk      | No concerns  | Major concerns | No concerns   | No concerns | Very low          | Within-study bias   Reporting bias   Imprecision |
| Bass vs Fones    | 2                 | No concerns       | Low risk       | No concerns  | Major concerns | No concerns   | No concerns | Low               | Imprecision                                      |
| Control vs Fones | 3                 | Some concerns     | Low risk       | No concerns  | Major concerns | No concerns   | No concerns | Very low          | Within-study bias   Imprecision                  |

## 6. CINeMA-Output: Secondary Gingivitis (all studies)

|    | study                    | year | feature    | outcome   | index | t1      | n1 | y1    | sd1   | rob | indirectness | t2    | n2 | y2    | sd2   |
|----|--------------------------|------|------------|-----------|-------|---------|----|-------|-------|-----|--------------|-------|----|-------|-------|
| 1  | Smutkeeree et al. (2011) | 2011 | gingivitis | secondary | GI    | Scrub   | 29 | 2.35  | 0.18  | 3   | 3            | Bass  | 28 | 2.4   | 0.27  |
| 2  | Harnacke et al. (2012)   | 2012 | gingivitis | secondary | PBI   | Control | 19 | 17.58 | 14.74 | 2   | 1            | Fones | 18 | 22.23 | 25.56 |
| 3  | Harnacke et al. (2012)   | 2012 | gingivitis | secondary | PBI   | Control | 19 | 17.58 | 14.74 | 2   | 1            | Bass  | 19 | 18.57 | 12.67 |
| 4  | Harnacke et al. (2012)   | 2012 | gingivitis | secondary | PBI   | Fones   | 18 | 22.23 | 25.56 | 2   | 1            | Bass  | 19 | 18.57 | 12.67 |
| 5  | Harnacke et al. (2016)   | 2016 | gingivitis | secondary | BOP   | Control | 22 | 11.79 | 6.65  | 1   | 1            | Fones | 23 | 10.5  | 6.91  |
| 6  | Harnacke et al. (2016)   | 2016 | gingivitis | secondary | BOP   | Control | 22 | 11.79 | 6.65  | 1   | 1            | Bass  | 24 | 11.15 | 8.4   |
| 7  | Harnacke et al. (2016)   | 2016 | gingivitis | secondary | BOP   | Fones   | 23 | 10.5  | 6.91  | 1   | 1            | Bass  | 24 | 11.15 | 8.4   |
| 8  | Schmalz et al. (2018)    | 2018 | gingivitis | secondary | GI    | Control | 22 | 1.03  | 0.11  | 2   | 2            | Fones | 22 | 0.96  | 0.11  |
| 9  | Janakiram et al. (2020)  | 2020 | gingivitis | secondary | GI    | Control | 40 | 0.9   | 0.61  | 2   | 2            | Fones | 40 | 1.1   | 0.5   |
| 10 | Janakiram et al. (2020)  | 2020 | gingivitis | secondary | GI    | Control | 40 | 0.9   | 0.61  | 2   | 2            | Bass  | 40 | 0.9   | 0.4   |
| 11 | Janakiram et al. (2020)  | 2020 | gingivitis | secondary | GI    | Fones   | 40 | 1.1   | 0.5   | 2   | 2            | Bass  | 40 | 0.9   | 0.4   |

Node size by:  Node color by:  Edge width by:  Edge color by:

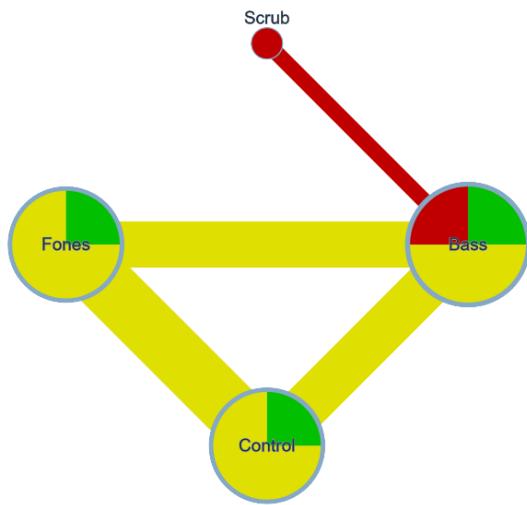

**Risk of bias contributions:** The bar chart shows the contributions of each piece of study to the network estimate

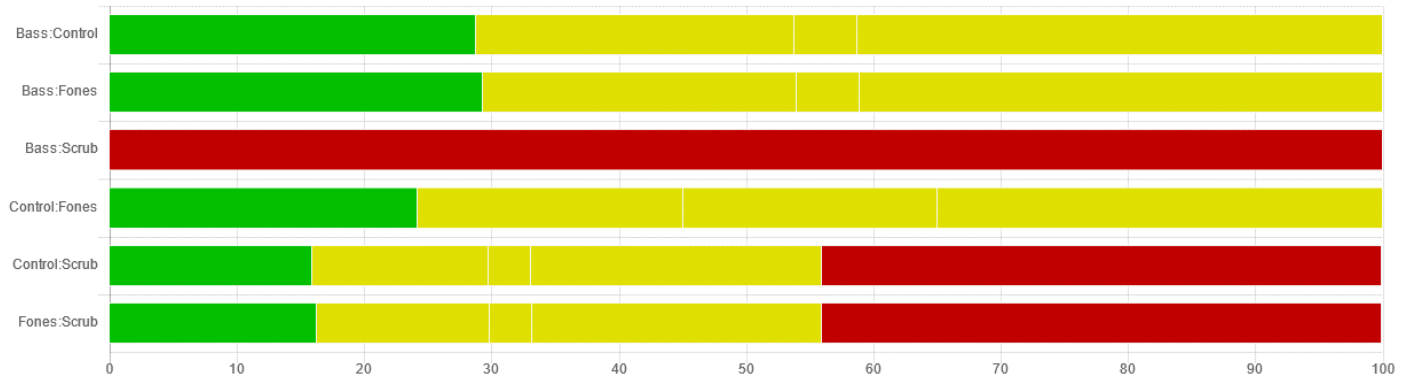

**Selected Rule: Average RoB**

|                                                                                                                                                                                                                           |                                                                                                                                                                                                                      |                                                                                                                                                                                                                         |                                                                                                                                                                                                                         |                                                                                                                                                                                                                             |
|---------------------------------------------------------------------------------------------------------------------------------------------------------------------------------------------------------------------------|----------------------------------------------------------------------------------------------------------------------------------------------------------------------------------------------------------------------|-------------------------------------------------------------------------------------------------------------------------------------------------------------------------------------------------------------------------|-------------------------------------------------------------------------------------------------------------------------------------------------------------------------------------------------------------------------|-----------------------------------------------------------------------------------------------------------------------------------------------------------------------------------------------------------------------------|
| <b>Comparison</b> Bass:Control<br><b>Evidence:</b> mixed<br>Majority RoB: Some concerns<br>Average RoB: <b>Some concerns</b><br>Highest RoB: Major concerns<br>NMA judgment <input type="text" value="Some concerns"/>    | <b>Comparison</b> Bass:Fones<br><b>Evidence:</b> mixed<br>Majority RoB: Some concerns<br>Average RoB: <b>Some concerns</b><br>Highest RoB: Major concerns<br>NMA judgment <input type="text" value="Some concerns"/> | <b>Comparison</b> Bass:Scrub<br><b>Evidence:</b> mixed<br>Majority RoB: Major concerns<br>Average RoB: <b>Major concerns</b><br>Highest RoB: Major concerns<br>NMA judgment <input type="text" value="Major concerns"/> | <b>Comparison</b> Control:Fones<br><b>Evidence:</b> mixed<br>Majority RoB: Some concerns<br>Average RoB: <b>Some concerns</b><br>Highest RoB: Major concerns<br>NMA judgment <input type="text" value="Some concerns"/> | <b>Comparison</b> Control:Scrub<br><b>Evidence:</b> indirect<br>Majority RoB: Major concerns<br>Average RoB: <b>Some concerns</b><br>Highest RoB: Major concerns<br>NMA judgment <input type="text" value="Some concerns"/> |
| <b>Comparison</b> Fones:Scrub<br><b>Evidence:</b> indirect<br>Majority RoB: Major concerns<br>Average RoB: <b>Some concerns</b><br>Highest RoB: Major concerns<br>NMA judgment <input type="text" value="Some concerns"/> |                                                                                                                                                                                                                      |                                                                                                                                                                                                                         |                                                                                                                                                                                                                         |                                                                                                                                                                                                                             |



**Reporting Bias:** The Comparison Bass:Control was manually set to high risk (rationale: statistics from Dosumo et al. 2019 and Ausenda et al. 2019 were not available for NMA)

|                                                                                                     |                                                                                                   |                                                                                                |                                                                                                   |
|-----------------------------------------------------------------------------------------------------|---------------------------------------------------------------------------------------------------|------------------------------------------------------------------------------------------------|---------------------------------------------------------------------------------------------------|
| <b>Comparison</b> Bass:Control<br><b>Evidence: mixed</b><br>Reporting bias judgment<br>High risk    | <b>Comparison</b> Bass:Fones<br><b>Evidence: mixed</b><br>Reporting bias judgment<br>Low risk     | <b>Comparison</b> Bass:Scrub<br><b>Evidence: direct</b><br>Reporting bias judgment<br>Low risk | <b>Comparison</b> Control:Fones<br><b>Evidence: direct</b><br>Reporting bias judgment<br>Low risk |
| <b>Comparison</b> Control:Scrub<br><b>Evidence: indirect</b><br>Reporting bias judgment<br>Low risk | <b>Comparison</b> Fones:Scrub<br><b>Evidence: indirect</b><br>Reporting bias judgment<br>Low risk |                                                                                                |                                                                                                   |

**Indirectness contributions**

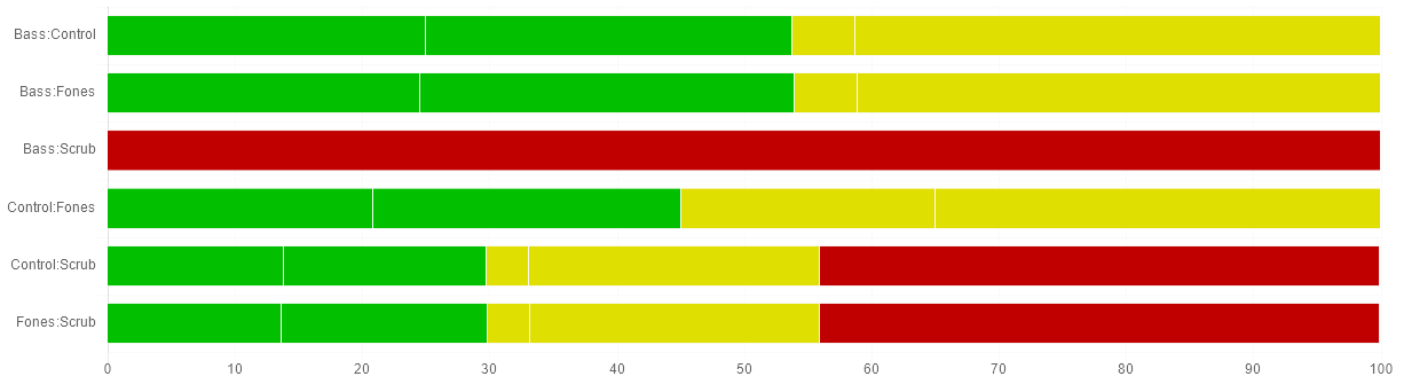

**Selected rule:** Average; indirect comparisons were manually set at high risk

|                                                                                                                                                                             |                                                                                                                                                                 |                                                                                                                                                                          |                                                                                                                                                                          |                                                                                                                                                                               |
|-----------------------------------------------------------------------------------------------------------------------------------------------------------------------------|-----------------------------------------------------------------------------------------------------------------------------------------------------------------|--------------------------------------------------------------------------------------------------------------------------------------------------------------------------|--------------------------------------------------------------------------------------------------------------------------------------------------------------------------|-------------------------------------------------------------------------------------------------------------------------------------------------------------------------------|
| <b>Comparison</b> Bass:Control<br><b>Evidence: mixed</b><br>Majority: No concerns<br>Average: No concerns<br>Highest: Major concerns<br>NMA judgment: No concerns           | <b>Comparison</b> Bass:Fones<br><b>Evidence: mixed</b><br>Majority: No concerns<br>Average: No concerns<br>Highest: Major concerns<br>NMA judgment: No concerns | <b>Comparison</b> Bass:Scrub<br><b>Evidence: mixed</b><br>Majority: Major concerns<br>Average: Major concerns<br>Highest: Major concerns<br>NMA judgment: Major concerns | <b>Comparison</b> Control:Fones<br><b>Evidence: mixed</b><br>Majority: Some concerns<br>Average: Some concerns<br>Highest: Major concerns<br>NMA judgment: Some concerns | <b>Comparison</b> Control:Scrub<br><b>Evidence: indirect</b><br>Majority: Major concerns<br>Average: Some concerns<br>Highest: Major concerns<br>NMA judgment: Major concerns |
| <b>Comparison</b> Fones:Scrub<br><b>Evidence: indirect</b><br>Majority: Major concerns<br>Average: Some concerns<br>Highest: Major concerns<br>NMA judgment: Major concerns |                                                                                                                                                                 |                                                                                                                                                                          |                                                                                                                                                                          |                                                                                                                                                                               |

**Imprecision:** Clinically important effect size set at 0.2

|                                                                                                                                                                                                                                                                 |                                                                                                                                                                                                                                                              |                                                                                                                                                                                                                                                             |                                                                                                                                                                                                                                                                |                                                                                                                                                                                                                                                                   |
|-----------------------------------------------------------------------------------------------------------------------------------------------------------------------------------------------------------------------------------------------------------------|--------------------------------------------------------------------------------------------------------------------------------------------------------------------------------------------------------------------------------------------------------------|-------------------------------------------------------------------------------------------------------------------------------------------------------------------------------------------------------------------------------------------------------------|----------------------------------------------------------------------------------------------------------------------------------------------------------------------------------------------------------------------------------------------------------------|-------------------------------------------------------------------------------------------------------------------------------------------------------------------------------------------------------------------------------------------------------------------|
| <b>Comparison</b> Bass:Control<br><b>Evidence: mixed</b><br>NMA estimate: -0.101<br>95% Confidence interval: Confidence interval (-0.495,0.294)<br><i>extends into clinically important effects in both directions</i><br>Imprecision judgment: Major concerns  | <b>Comparison</b> Bass:Fones<br><b>Evidence: mixed</b><br>NMA estimate: -0.096<br>95% Confidence interval: Confidence interval (-0.491,0.300)<br><i>extends into clinically important effects in both directions</i><br>Imprecision judgment: Major concerns | <b>Comparison</b> Bass:Scrub<br><b>Evidence: mixed</b><br>NMA estimate: 0.216<br>95% Confidence interval: Confidence interval (-0.472,0.903)<br><i>extends into clinically important effects in both directions</i><br>Imprecision judgment: Major concerns | <b>Comparison</b> Control:Fones<br><b>Evidence: mixed</b><br>NMA estimate: 0.005<br>95% Confidence interval: Confidence interval (-0.355,0.365)<br><i>extends into clinically important effects in both directions</i><br>Imprecision judgment: Major concerns | <b>Comparison</b> Control:Scrub<br><b>Evidence: indirect</b><br>NMA estimate: 0.316<br>95% Confidence interval: Confidence interval (-0.476,1.109)<br><i>extends into clinically important effects in both directions</i><br>Imprecision judgment: Major concerns |
| <b>Comparison</b> Fones:Scrub<br><b>Evidence: indirect</b><br>NMA estimate: 0.311<br>95% Confidence interval: Confidence interval (-0.482,1.105)<br><i>extends into clinically important effects in both directions</i><br>Imprecision judgment: Major concerns |                                                                                                                                                                                                                                                              |                                                                                                                                                                                                                                                             |                                                                                                                                                                                                                                                                |                                                                                                                                                                                                                                                                   |

## Heterogeneity

The estimated value of between-study variance for the network meta-analysis is **0.052**

|                                                                                                                                                                                                                                                                                                                                                               |                                                                                                                                                                                                                                                                                                                                                            |                                                                                                                                                                                                                                                                                                                                                           |                                                                                                                                                                                                                                                                                                                                                              |                                                                                                                                                                                                                                                                                                                                                                 |
|---------------------------------------------------------------------------------------------------------------------------------------------------------------------------------------------------------------------------------------------------------------------------------------------------------------------------------------------------------------|------------------------------------------------------------------------------------------------------------------------------------------------------------------------------------------------------------------------------------------------------------------------------------------------------------------------------------------------------------|-----------------------------------------------------------------------------------------------------------------------------------------------------------------------------------------------------------------------------------------------------------------------------------------------------------------------------------------------------------|--------------------------------------------------------------------------------------------------------------------------------------------------------------------------------------------------------------------------------------------------------------------------------------------------------------------------------------------------------------|-----------------------------------------------------------------------------------------------------------------------------------------------------------------------------------------------------------------------------------------------------------------------------------------------------------------------------------------------------------------|
| <p><b>Comparison</b> Bass:Control<br/>Evidence: mixed</p> <p>NMA estimate: -0.101<br/>95% intervals for NMA estimate</p> <p>Confidence interval: (-0.495,0.294)<br/>Prediction interval: (-0.948,0.746)</p> <p>Confidence and prediction intervals <b>agree</b> in relation to clinically important effect</p> <p>Heterogeneity judgment<br/>No concerns</p>  | <p><b>Comparison</b> Bass:Fones<br/>Evidence: mixed</p> <p>NMA estimate: -0.096<br/>95% intervals for NMA estimate</p> <p>Confidence interval: (-0.491,0.300)<br/>Prediction interval: (-0.943,0.752)</p> <p>Confidence and prediction intervals <b>agree</b> in relation to clinically important effect</p> <p>Heterogeneity judgment<br/>No concerns</p> | <p><b>Comparison</b> Bass:Scrub<br/>Evidence: mixed</p> <p>NMA estimate: 0.216<br/>95% intervals for NMA estimate</p> <p>Confidence interval: (-0.472,0.903)<br/>Prediction interval: (-0.948,1.379)</p> <p>Confidence and prediction intervals <b>agree</b> in relation to clinically important effect</p> <p>Heterogeneity judgment<br/>No concerns</p> | <p><b>Comparison</b> Control:Fones<br/>Evidence: mixed</p> <p>NMA estimate: 0.005<br/>95% intervals for NMA estimate</p> <p>Confidence interval: (-0.355,0.365)<br/>Prediction interval: (-0.810,0.820)</p> <p>Confidence and prediction intervals <b>agree</b> in relation to clinically important effect</p> <p>Heterogeneity judgment<br/>No concerns</p> | <p><b>Comparison</b> Control:Scrub<br/>Evidence: indirect</p> <p>NMA estimate: 0.316<br/>95% intervals for NMA estimate</p> <p>Confidence interval: (-0.476,1.109)<br/>Prediction interval: (-0.974,1.607)</p> <p>Confidence and prediction intervals <b>agree</b> in relation to clinically important effect</p> <p>Heterogeneity judgment<br/>No concerns</p> |
| <p><b>Comparison</b> Fones:Scrub<br/>Evidence: indirect</p> <p>NMA estimate: 0.311<br/>95% intervals for NMA estimate</p> <p>Confidence interval: (-0.482,1.105)<br/>Prediction interval: (-0.980,1.603)</p> <p>Confidence and prediction intervals <b>agree</b> in relation to clinically important effect</p> <p>Heterogeneity judgment<br/>No concerns</p> |                                                                                                                                                                                                                                                                                                                                                            |                                                                                                                                                                                                                                                                                                                                                           |                                                                                                                                                                                                                                                                                                                                                              |                                                                                                                                                                                                                                                                                                                                                                 |

## Incoherence

Global test based on a random-effects design-by-treatment interaction model

$\chi^2$  statistic: 5.608 (1 degrees of freedom), P value: 0.018

|                                                                                                                                                                                                                                                                                                                                                                                                                           |                                                                                                                                                                                                                                                                                                                                                                                                                       |                                                                                                                                                                                                                    |                                                                                                                                                                                                                       |
|---------------------------------------------------------------------------------------------------------------------------------------------------------------------------------------------------------------------------------------------------------------------------------------------------------------------------------------------------------------------------------------------------------------------------|-----------------------------------------------------------------------------------------------------------------------------------------------------------------------------------------------------------------------------------------------------------------------------------------------------------------------------------------------------------------------------------------------------------------------|--------------------------------------------------------------------------------------------------------------------------------------------------------------------------------------------------------------------|-----------------------------------------------------------------------------------------------------------------------------------------------------------------------------------------------------------------------|
| <p><b>Comparison</b> Bass:Control<br/>Evidence: mixed</p> <p>NMA standardised mean difference: -0.101(-0.495,0.294)<br/>Direct standardised mean difference: -0.012(-0.418,0.395)<br/>Indirect standardised mean difference: -1.567(-3.218,0.084)</p> <p>Inconsistency measures<br/>Difference of standardised mean differences: 1.555(-0.145,3.255)<br/>P value: 0.073</p> <p>Incoherence judgment<br/>Some concerns</p> | <p><b>Comparison</b> Bass:Fones<br/>Evidence: mixed</p> <p>NMA standardised mean difference: -0.096(-0.491,0.300)<br/>Direct standardised mean difference: -0.187(-0.595,0.220)<br/>Indirect standardised mean difference: 1.392(-0.250,3.034)</p> <p>Inconsistency measures<br/>Difference of standardised mean differences: -1.579(-3.271,0.113)<br/>P value: 0.067</p> <p>Incoherence judgment<br/>No concerns</p> | <p><b>Comparison</b> Bass:Scrub<br/>Evidence: direct</p> <p>Direct standardised mean difference: 0.216(-0.472,0.903)<br/>Inconsistency measures: Not applicable</p> <p>Incoherence judgment<br/>Major concerns</p> | <p><b>Comparison</b> Control:Fones<br/>Evidence: direct</p> <p>Direct standardised mean difference: 0.005(-0.355,0.365)<br/>Inconsistency measures: Not applicable</p> <p>Incoherence judgment<br/>Major concerns</p> |
| <p><b>Comparison</b> Control:Scrub<br/>Evidence: indirect</p> <p>Indirect standardised mean difference: 0.316(-0.476,1.109)<br/>Inconsistency measures: Not applicable</p> <p>Incoherence judgment<br/>Major concerns</p>                                                                                                                                                                                                 | <p><b>Comparison</b> Fones:Scrub<br/>Evidence: indirect</p> <p>Indirect standardised mean difference: 0.311(-0.482,1.105)<br/>Inconsistency measures: Not applicable</p> <p>Incoherence judgment<br/>Major concerns</p>                                                                                                                                                                                               |                                                                                                                                                                                                                    |                                                                                                                                                                                                                       |

## Overall rating of the confidence into the evidence

| Comparison        | Number of Studies | Within-study bias | Reporting bias | Indirectness   | Imprecision    | Heterogeneity | Incoherence    | Confidence rating | Reason(s) for downgrading                                      |
|-------------------|-------------------|-------------------|----------------|----------------|----------------|---------------|----------------|-------------------|----------------------------------------------------------------|
| Mixed evidence    |                   |                   |                |                |                |               |                |                   |                                                                |
| Bass vs Control   | 3                 | Some concerns     | High risk      | No concerns    | Major concerns | No concerns   | Some concerns  | Very low          | Within-study bias   Reporting bias   Imprecision   Incoherence |
| Bass vs Fones     | 3                 | Some concerns     | Low risk       | No concerns    | Major concerns | No concerns   | No concerns    | Very low          | Within-study bias   Imprecision                                |
| Bass vs Scrub     | 1                 | Major concerns    | Low risk       | Major concerns | Major concerns | No concerns   | Major concerns | Very low          | Within-study bias   Indirectness   Imprecision   Incoherence   |
| Control vs Fones  | 4                 | Some concerns     | Low risk       | Some concerns  | Major concerns | No concerns   | Major concerns | Very low          | Within-study bias   Indirectness   Imprecision   Incoherence   |
| Indirect evidence |                   |                   |                |                |                |               |                |                   |                                                                |
| Control vs Scrub  | --                | Some concerns     | Low risk       | Major concerns | Major concerns | No concerns   | Major concerns | Very low          | Within-study bias   Indirectness   Imprecision   Incoherence   |
| Fones vs Scrub    | --                | Some concerns     | Low risk       | Major concerns | Major concerns | No concerns   | Major concerns | Very low          | Within-study bias   Indirectness   Imprecision   Incoherence   |

## 7. CINeMA-Output: Secondary Gingivitis (studies with adults only)

|    | study                   | year | feature    | outcome   | index | t1      | n1 | y1    | sd1   | rob | indirectness | t2    | n2 | y2    | sd2   |
|----|-------------------------|------|------------|-----------|-------|---------|----|-------|-------|-----|--------------|-------|----|-------|-------|
| 1  | Harnacke et al. (2012)  | 2012 | gingivitis | secondary | PBI   | Control | 19 | 17.58 | 14.74 | 2   | 1            | Fones | 18 | 22.23 | 25.56 |
| 2  | Harnacke et al. (2012)  | 2012 | gingivitis | secondary | PBI   | Control | 19 | 17.58 | 14.74 | 2   | 1            | Bass  | 19 | 18.57 | 12.67 |
| 3  | Harnacke et al. (2012)  | 2012 | gingivitis | secondary | PBI   | Fones   | 18 | 22.23 | 25.56 | 2   | 1            | Bass  | 19 | 18.57 | 12.67 |
| 4  | Harnacke et al. (2016)  | 2016 | gingivitis | secondary | BOP   | Control | 22 | 11.79 | 6.65  | 1   | 1            | Fones | 23 | 10.5  | 6.91  |
| 5  | Harnacke et al. (2016)  | 2016 | gingivitis | secondary | BOP   | Control | 22 | 11.79 | 6.65  | 1   | 1            | Bass  | 24 | 11.15 | 8.4   |
| 6  | Harnacke et al. (2016)  | 2016 | gingivitis | secondary | BOP   | Fones   | 23 | 10.5  | 6.91  | 1   | 1            | Bass  | 24 | 11.15 | 8.4   |
| 7  | Schmalz et al. (2018)   | 2018 | gingivitis | secondary | GI    | Control | 22 | 1.03  | 0.11  | 2   | 2            | Fones | 22 | 0.96  | 0.11  |
| 8  | Janakiram et al. (2020) | 2020 | gingivitis | secondary | GI    | Control | 40 | 0.9   | 0.61  | 2   | 2            | Fones | 40 | 1.1   | 0.5   |
| 9  | Janakiram et al. (2020) | 2020 | gingivitis | secondary | GI    | Control | 40 | 0.9   | 0.61  | 2   | 2            | Bass  | 40 | 0.9   | 0.4   |
| 10 | Janakiram et al. (2020) | 2020 | gingivitis | secondary | GI    | Fones   | 40 | 1.1   | 0.5   | 2   | 2            | Bass  | 40 | 0.9   | 0.4   |

Node size by:  Node color by:  Edge width by:  Edge color by:

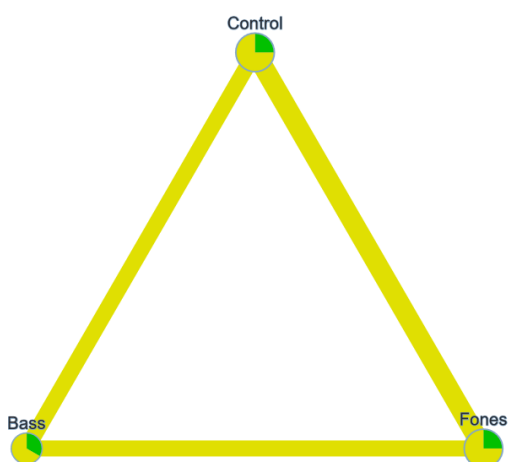

**Risk of bias contributions:** The bar chart shows the contributions of each piece of study to the network estimate

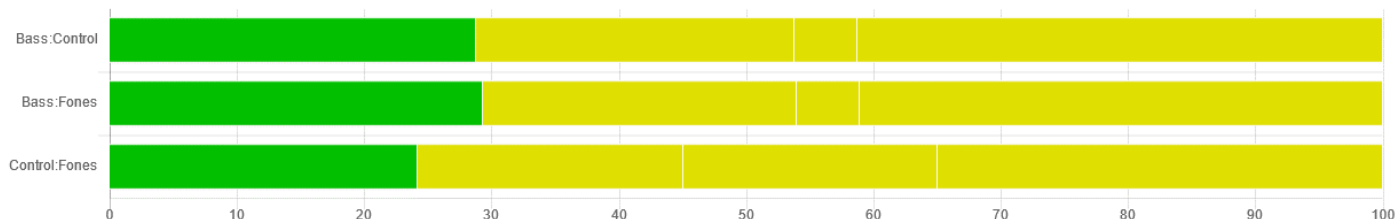

**Selected Rule: Average RoB**

| Comparison      | Bass:Control                               | Comparison      | Bass:Fones                                 | Comparison      | Control:Fones                              |
|-----------------|--------------------------------------------|-----------------|--------------------------------------------|-----------------|--------------------------------------------|
| Evidence: mixed |                                            | Evidence: mixed |                                            | Evidence: mixed |                                            |
| Majority RoB:   | Some concerns                              | Majority RoB:   | Some concerns                              | Majority RoB:   | Some concerns                              |
| Average RoB:    | <b>Some concerns</b>                       | Average RoB:    | <b>Some concerns</b>                       | Average RoB:    | <b>Some concerns</b>                       |
| Highest RoB:    | Some concerns                              | Highest RoB:    | Some concerns                              | Highest RoB:    | Some concerns                              |
| NMA judgment    | <input type="text" value="Some concerns"/> | NMA judgment    | <input type="text" value="Some concerns"/> | NMA judgment    | <input type="text" value="Some concerns"/> |

**Reporting Bias:** The Comparison Bass:Control was manually set to high risk (rationale: statistics from Dosumo et al. 2019 and Ausenda et al. 2019 were not available for NMA)

|                                                                                                  |                                                                                               |                                                                                                   |
|--------------------------------------------------------------------------------------------------|-----------------------------------------------------------------------------------------------|---------------------------------------------------------------------------------------------------|
| <b>Comparison</b> Bass:Control<br><b>Evidence: mixed</b><br>Reporting bias judgment<br>High risk | <b>Comparison</b> Bass:Fones<br><b>Evidence: mixed</b><br>Reporting bias judgment<br>Low risk | <b>Comparison</b> Control:Fones<br><b>Evidence: direct</b><br>Reporting bias judgment<br>Low risk |
|--------------------------------------------------------------------------------------------------|-----------------------------------------------------------------------------------------------|---------------------------------------------------------------------------------------------------|

**Indirectness contributions**

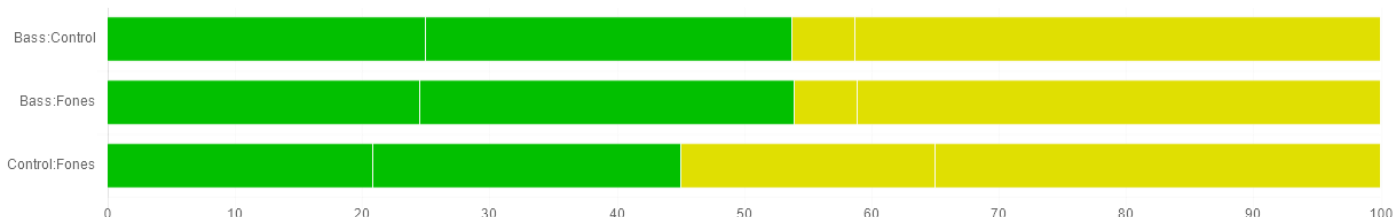

**Selected rule: Average**

|                                                                                                                                                                 |                                                                                                                                                               |                                                                                                                                                                        |
|-----------------------------------------------------------------------------------------------------------------------------------------------------------------|---------------------------------------------------------------------------------------------------------------------------------------------------------------|------------------------------------------------------------------------------------------------------------------------------------------------------------------------|
| <b>Comparison</b> Bass:Control<br><b>Evidence: mixed</b><br>Majority: No concerns<br>Average: No concerns<br>Highest: Some concerns<br>NMA judgment No concerns | <b>Comparison</b> Bass:Fones<br><b>Evidence: mixed</b><br>Majority: No concerns<br>Average: No concerns<br>Highest: Some concerns<br>NMA judgment No concerns | <b>Comparison</b> Control:Fones<br><b>Evidence: mixed</b><br>Majority: Some concerns<br>Average: Some concerns<br>Highest: Some concerns<br>NMA judgment Some concerns |
|-----------------------------------------------------------------------------------------------------------------------------------------------------------------|---------------------------------------------------------------------------------------------------------------------------------------------------------------|------------------------------------------------------------------------------------------------------------------------------------------------------------------------|

**Imprecision:** Clinically important effect size set at 0.2

|                                                                                                                                                                                                                                                                         |                                                                                                                                                                                                                                                                       |                                                                                                                                                                                                                                                                         |
|-------------------------------------------------------------------------------------------------------------------------------------------------------------------------------------------------------------------------------------------------------------------------|-----------------------------------------------------------------------------------------------------------------------------------------------------------------------------------------------------------------------------------------------------------------------|-------------------------------------------------------------------------------------------------------------------------------------------------------------------------------------------------------------------------------------------------------------------------|
| <b>Comparison</b> Bass:Control<br><b>Evidence: mixed</b><br>NMA estimate: -0.101<br>95% Confidence interval:<br><i>Confidence interval (-0.495,0.294)</i><br>extends into clinically important effects in <b>both</b> directions<br>Imprecision judgment Major concerns | <b>Comparison</b> Bass:Fones<br><b>Evidence: mixed</b><br>NMA estimate: -0.096<br>95% Confidence interval:<br><i>Confidence interval (-0.491,0.300)</i><br>extends into clinically important effects in <b>both</b> directions<br>Imprecision judgment Major concerns | <b>Comparison</b> Control:Fones<br><b>Evidence: mixed</b><br>NMA estimate: 0.005<br>95% Confidence interval:<br><i>Confidence interval (-0.355,0.365)</i><br>extends into clinically important effects in <b>both</b> directions<br>Imprecision judgment Major concerns |
|-------------------------------------------------------------------------------------------------------------------------------------------------------------------------------------------------------------------------------------------------------------------------|-----------------------------------------------------------------------------------------------------------------------------------------------------------------------------------------------------------------------------------------------------------------------|-------------------------------------------------------------------------------------------------------------------------------------------------------------------------------------------------------------------------------------------------------------------------|

## Heterogeneity

The estimated value of between-study variance for the network meta-analysis is **0.052**

|                                                                                                                                                                                                                                                                                                                                                           |                                                                                                                                                                                                                                                                                                                                                         |                                                                                                                                                                                                                                                                                                                                                           |
|-----------------------------------------------------------------------------------------------------------------------------------------------------------------------------------------------------------------------------------------------------------------------------------------------------------------------------------------------------------|---------------------------------------------------------------------------------------------------------------------------------------------------------------------------------------------------------------------------------------------------------------------------------------------------------------------------------------------------------|-----------------------------------------------------------------------------------------------------------------------------------------------------------------------------------------------------------------------------------------------------------------------------------------------------------------------------------------------------------|
| <p><b>Comparison</b> Bass:Control<br/>Evidence: mixed</p> <p>NMA estimate: -0.101<br/>95% intervals for NMA estimate<br/>Confidence interval: (-0.495,0.294)<br/>Prediction interval: (-0.948,0.746)</p> <p><i>Confidence and prediction intervals agree in relation to clinically important effect</i></p> <p>Heterogeneity judgment<br/>No concerns</p> | <p><b>Comparison</b> Bass:Fones<br/>Evidence: mixed</p> <p>NMA estimate: -0.096<br/>95% intervals for NMA estimate<br/>Confidence interval: (-0.491,0.300)<br/>Prediction interval: (-0.943,0.752)</p> <p><i>Confidence and prediction intervals agree in relation to clinically important effect</i></p> <p>Heterogeneity judgment<br/>No concerns</p> | <p><b>Comparison</b> Control:Fones<br/>Evidence: mixed</p> <p>NMA estimate: 0.005<br/>95% intervals for NMA estimate<br/>Confidence interval: (-0.355,0.365)<br/>Prediction interval: (-0.810,0.820)</p> <p><i>Confidence and prediction intervals agree in relation to clinically important effect</i></p> <p>Heterogeneity judgment<br/>No concerns</p> |
|-----------------------------------------------------------------------------------------------------------------------------------------------------------------------------------------------------------------------------------------------------------------------------------------------------------------------------------------------------------|---------------------------------------------------------------------------------------------------------------------------------------------------------------------------------------------------------------------------------------------------------------------------------------------------------------------------------------------------------|-----------------------------------------------------------------------------------------------------------------------------------------------------------------------------------------------------------------------------------------------------------------------------------------------------------------------------------------------------------|

## Incoherence

Global test based on a random-effects design-by-treatment interaction model

$\chi^2$  statistic: 5.608 (1 degrees of freedom), P value: 0.018

|                                                                                                                                                                                                                                                                                                                                                                                                                           |                                                                                                                                                                                                                                                                                                                                                                                                                       |                                                                                                                                                                                                                       |
|---------------------------------------------------------------------------------------------------------------------------------------------------------------------------------------------------------------------------------------------------------------------------------------------------------------------------------------------------------------------------------------------------------------------------|-----------------------------------------------------------------------------------------------------------------------------------------------------------------------------------------------------------------------------------------------------------------------------------------------------------------------------------------------------------------------------------------------------------------------|-----------------------------------------------------------------------------------------------------------------------------------------------------------------------------------------------------------------------|
| <p><b>Comparison</b> Bass:Control<br/>Evidence: mixed</p> <p>NMA standardised mean difference: -0.101(-0.495,0.294)<br/>Direct standardised mean difference: -0.012(-0.418,0.395)<br/>Indirect standardised mean difference: -1.567(-3.218,0.084)</p> <p>Inconsistency measures<br/>Difference of standardised mean differences: 1.555(-0.145,3.255)<br/>P value: 0.073</p> <p>Incoherence judgment<br/>Some concerns</p> | <p><b>Comparison</b> Bass:Fones<br/>Evidence: mixed</p> <p>NMA standardised mean difference: -0.096(-0.491,0.300)<br/>Direct standardised mean difference: -0.187(-0.595,0.220)<br/>Indirect standardised mean difference: 1.392(-0.250,3.034)</p> <p>Inconsistency measures<br/>Difference of standardised mean differences: -1.579(-3.271,0.113)<br/>P value: 0.067</p> <p>Incoherence judgment<br/>No concerns</p> | <p><b>Comparison</b> Control:Fones<br/>Evidence: direct</p> <p>Direct standardised mean difference: 0.005(-0.355,0.365)<br/>Inconsistency measures: Not applicable</p> <p>Incoherence judgment<br/>Major concerns</p> |
|---------------------------------------------------------------------------------------------------------------------------------------------------------------------------------------------------------------------------------------------------------------------------------------------------------------------------------------------------------------------------------------------------------------------------|-----------------------------------------------------------------------------------------------------------------------------------------------------------------------------------------------------------------------------------------------------------------------------------------------------------------------------------------------------------------------------------------------------------------------|-----------------------------------------------------------------------------------------------------------------------------------------------------------------------------------------------------------------------|

## Overall rating of the confidence into the evidence

| Comparison       | Number of Studies | Within-study bias | Reporting bias | Indirectness  | Imprecision    | Heterogeneity | Incoherence    | Confidence rating | Reason(s) for downgrading                                      |
|------------------|-------------------|-------------------|----------------|---------------|----------------|---------------|----------------|-------------------|----------------------------------------------------------------|
| Mixed evidence   |                   |                   |                |               |                |               |                |                   |                                                                |
| Bass vs Control  | 3                 | Some concerns     | High risk      | No concerns   | Major concerns | No concerns   | Some concerns  | Very low          | Within-study bias   Reporting bias   Imprecision   Incoherence |
| Bass vs Fones    | 3                 | Some concerns     | Low risk       | No concerns   | Major concerns | No concerns   | No concerns    | Very low          | Within-study bias   Imprecision                                |
| Control vs Fones | 4                 | Some concerns     | Low risk       | Some concerns | Major concerns | No concerns   | Major concerns | Very low          | Within-study bias   Indirectness   Imprecision   Incoherence   |
