# Supplementary material for: Manual toothbrushing techniques for plaque removal and the prevention of gingivitis—A systematic review with network meta-analysis
Source: PubMed Central journal article supplement (PMC11226064; doi:10.1371/journal.pone.0306302), 2024-07-05
Supplement: pone.0306302.s005.pdf [file pone.0306302.s005.pdf]

**Table S1:** Comparison of additionally assessed plaque indices that were not part of the NMA according to the study protocol specifications

| Outcome date/Study                                       | index | weeks after intervention | 1st study arm compared |    |                   | 2nd study arm compared |              |    | standardized mean difference |                 |       |      |             |             |       |
|----------------------------------------------------------|-------|--------------------------|------------------------|----|-------------------|------------------------|--------------|----|------------------------------|-----------------|-------|------|-------------|-------------|-------|
|                                                          |       |                          | Intervention           | n* | mean <sup>+</sup> | SD <sup>+</sup>        | Intervention | n* | mean <sup>+</sup>            | SD <sup>+</sup> | SMD   | SE   | CI (95%) lb | CI (95%) ub | p     |
| <b>Primary outcome date (Last date of assessment)</b>    |       |                          |                        |    |                   |                        |              |    |                              |                 |       |      |             |             |       |
| Deinzer et al. natural teeth [40]                        | TQHI  | 12                       | NST                    | 30 | 1.79              | 0.56                   | Fones        | 32 | 1.87                         | 0.52            | -0.15 | 0.25 | -0.65       | 0.35        | 0.565 |
|                                                          |       |                          | NST                    | 30 | 1.79              | 0.56                   | Bass         | 30 | 1.63                         | 0.43            | 0.32  | 0.26 | -0.19       | 0.83        | 0.223 |
|                                                          |       |                          | Fones                  | 32 | 1.87              | 0.52                   | Bass         | 30 | 1.63                         | 0.43            | 0.50  | 0.26 | -0.01       | 1.00        | 0.055 |
| Deinzer et al. crowned teeth [40]                        | TQHI  | 12                       | NST                    | 30 | 0.91              | 0.49                   | Fones        | 32 | 0.9                          | 0.48            | 0.02  | 0.25 | -0.48       | 0.52        | 0.936 |
|                                                          |       |                          | NST                    | 30 | 0.91              | 0.49                   | Bass         | 30 | 0.93                         | 0.7             | -0.03 | 0.26 | -0.54       | 0.47        | 0.899 |
|                                                          |       |                          | Fones                  | 32 | 0.9               | 0.48                   | Bass         | 30 | 0.93                         | 0.7             | -0.05 | 0.25 | -0.55       | 0.45        | 0.845 |
| Harnacke et al. 2012 [41]                                | TQHI  | 28                       | NST                    | 19 | 1.86              | 0.52                   | Fones        | 19 | 1.68                         | 0.49            | 0.35  | 0.33 | -0.29       | 0.99        | 0.286 |
|                                                          |       |                          | NST                    | 19 | 1.86              | 0.52                   | Bass         | 18 | 1.97                         | 0.54            | -0.20 | 0.33 | -0.85       | 0.44        | 0.538 |
|                                                          |       |                          | Fones                  | 19 | 1.68              | 0.49                   | Bass         | 18 | 1.97                         | 0.54            | -0.55 | 0.34 | -1.21       | 0.11        | 0.100 |
| <b>Secondary outcome date (First date of assessment)</b> |       |                          |                        |    |                   |                        |              |    |                              |                 |       |      |             |             |       |
| Deinzer et al. natural teeth [40]                        | TQHI  | 6                        | NST                    | 30 | 1.94              | 0.59                   | Fones        | 32 | 1.88                         | 0.6             | 0.10  | 0.25 | -0.40       | 0.60        | 0.695 |
|                                                          |       |                          | NST                    | 30 | 1.94              | 0.59                   | Bass         | 30 | 1.73                         | 0.49            | 0.38  | 0.26 | -0.13       | 0.89        | 0.142 |
|                                                          |       |                          | Fones                  | 32 | 1.88              | 0.6                    | Bass         | 30 | 1.73                         | 0.49            | 0.27  | 0.26 | -0.23       | 0.77        | 0.291 |
| Deinzer et al. crowned teeth [40]                        | TQHI  | 6                        | NST                    | 30 | 1.03              | 0.61                   | Fones        | 32 | 0.96                         | 0.51            | 0.12  | 0.25 | -0.38       | 0.62        | 0.628 |
|                                                          |       |                          | NST                    | 30 | 1.03              | 0.61                   | Bass         | 30 | 1.1                          | 0.72            | -0.10 | 0.26 | -0.61       | 0.40        | 0.689 |
|                                                          |       |                          | Fones                  | 32 | 0.96              | 0.51                   | Bass         | 30 | 1.1                          | 0.72            | -0.22 | 0.25 | -0.72       | 0.28        | 0.382 |
| Harnacke et al. [41]                                     | TQHI  | 6                        | NST                    | 19 | 2.03              | 0.55                   | Fones        | 18 | 1.71                         | 0.44            | 0.63  | 0.34 | -0.03       | 1.29        | 0.063 |
|                                                          |       |                          | NST                    | 19 | 2.03              | 0.55                   | Bass         | 19 | 2.02                         | 0.46            | 0.02  | 0.32 | -0.62       | 0.66        | 0.953 |
|                                                          |       |                          | Fones                  | 18 | 1.71              | 0.44                   | Bass         | 19 | 2.02                         | 0.46            | -0.67 | 0.34 | -1.34       | -0.01       | 0.046 |

\*number of participants analyzed (for total n and drop outs see Appendix 2);<sup>†</sup>Values retrieved from the authors; SD: Standard deviation; SMD: standardized mean difference (Hedges 1981); SE: standard errors of the observed standardized mean difference; CI (95%) lb: lower border of the 95% confidence interval of SMD (Hedges 1981); CI (95%) ub: upper border of the 95% confidence interval of SMD (Hedges, 1981); p: probability value of corresponding SMD; NST: no specific technique

**Table S2:** Comparison of additionally assessed gingivitis indices that were not part of the NMA according to the study protocol specifications

| Outcome date/Study                                       | index | weeks after intervention | 1st study arm compared |    |      | 2nd study arm compared |              |    | standardized mean difference |      |      |      |             |             |        |
|----------------------------------------------------------|-------|--------------------------|------------------------|----|------|------------------------|--------------|----|------------------------------|------|------|------|-------------|-------------|--------|
|                                                          |       |                          | Intervention           | n* | mean | SD                     | Intervention | n* | mean                         | SD   | SMD  | SE   | CI (95%) lb | CI (95%) ub | p      |
| <b>Primary outcome date (Last date of assessment)</b>    |       |                          |                        |    |      |                        |              |    |                              |      |      |      |             |             |        |
| Schmalz et al. [50]                                      | PBI   |                          | NST                    | 22 | 0.58 | 0.44                   | Fones        | 22 | 0.53                         | 0.35 | 0.12 | 0.30 | -0.47       | 0.72        | 0.6824 |
| <b>Secondary outcome date (First date of assessment)</b> |       |                          |                        |    |      |                        |              |    |                              |      |      |      |             |             |        |
| Schmalz et al. [50]                                      | PBI   |                          | NST                    | 22 | 0.58 | 0.32                   | Fones        | 22 | 0.48                         | 0.44 | 0.26 | 0.30 | -0.34       | 0.85        | 0.3991 |

\*number of participants analyzed (for total n and drop outs see Appendix S2); SD: Standard deviation; SMD: standardized mean difference[32]; SE: standard errors of the observed standardized mean difference; CI (95%) lb: lower border of the 95% confidence interval of SMD[32]; CI (95%) ub: upper border of the 95% confidence interval of SMD [32]; p: probability value of corresponding SMD; NST: no specific technique; NST: No specific technique; TQHI: Turesky's modification of the Quigley and Hein Index; PBI: Papillary bleeding index.
